1 **Genomic landscape of tumor-host interactions with differential prognostic and**  
2 **predictive connotations**

3

4 Jessica Roelands<sup>1,2\*</sup>, Wouter Hendrickx<sup>1,3\*#</sup>, Peter J.K. Kuppen<sup>2</sup>, Raghvendra Mall<sup>4</sup>, Gabriele  
5 Zoppoli<sup>5,6</sup>, Mohamad Saad<sup>4</sup>, Kyle Halliwill<sup>7</sup>, Giuseppe Curigliano<sup>8,9</sup>, Darawan Rinchai<sup>1</sup>, Julie  
6 Decock<sup>10</sup>, Lucia G Delogu<sup>11</sup>, Tolga Turan<sup>7</sup>, Josue Samayoa<sup>7</sup>, Lotfi Chouchane<sup>12</sup>, Ena Wang<sup>13</sup>,  
7 Pascal Finetti<sup>14</sup>, Francois Bertucci<sup>14</sup>, Lance D Miller<sup>15</sup>, Jerome Galon<sup>16</sup>, Francesco M  
8 Marincola<sup>17</sup>, Michele Ceccarelli<sup>7#</sup>, Davide Bedognetti<sup>1,3#</sup>

9

- 10 1. Department of Immunology, Inflammation and Metabolism, Division of Translational  
11 Medicine, Research Branch, Sidra Medicine, Doha, Qatar
- 12 2. Department of Surgery, Leiden University Medical Center, Leiden, The Netherlands
- 13 3. College of Health and Life Sciences (CHLS), Hamad Bin Khalifa University (HBKU),  
14 Doha, Qatar.
- 15 4. Qatar Computing Research Institute, Hamad Bin Khalifa University, Doha, Qatar
- 16 5. IRCCS Ospedale Policlinico San Martino, Genova, Italy
- 17 6. Department of Internal Medicine, University of Genova, Genova, Italy
- 18 7. Computational Biology, Computational Oncology and Immunology (CIAO), AbbVie  
19 Biotherapeutics, Inc, Redwood City, California, United States of America
- 20 8. University of Milano, Department of Oncology and Hemato-Oncology
- 21 9. European Institute of Oncology, IRCCS, Milano, Italy
- 22 10. Cancer Research Center, Qatar Biomedical Research Institute (QBRI), Hamad Bin  
23 Khalifa University (HBKU), Qatar Foundation (QF), Doha, Qatar.
- 24 11. Istituto di Ricerca Pediatrica, Fondazione Città della Speranza, Padua, Italy
- 25 12. Laboratory of Genetic Medicine and Immunology, Weill Cornell Medicine-Qatar,  
26 Qatar
- 27 13. Allogene Therapeutics, South San Francisco, California
- 28 14. Department of Molecular Oncology, Institut Paoli-Calmettes, Centre de Recherche  
29 en Cancerologie de Marseille, UMR1068 Inserm, Marseille, France
- 30 15. Wake Forest Comprehensive Cancer Center, Winston-Salem, NC, USA.
- 31 16. INSERM, Laboratory of Integrative Cancer Immunology, Equipe Labellisée Ligue  
32 Contre le Cancer, Sorbonne Université, Sorbonne Paris Cité, Université Paris  
33 Descartes, Université Paris Diderot; Centre de Recherche des Cordeliers, F-75006  
34 Paris, France
- 35 17. Refuge Biotechnologies, Menlo Park, California, 94025

36

- 37 # Corresponding authors  
38 Davide Bedognetti: [dbdognetti@sidra.org](mailto:dbdognetti@sidra.org)  
39 Wouter Hendrickx: [whendrickx@sidra.org](mailto:whendrickx@sidra.org)  
40 Michele Ceccarelli: [mceccarelli@abbvie.com](mailto:mceccarelli@abbvie.com)  
41  
42 \* Equal contribution

43 **Abstract**

44 An immune active cancer phenotype typified by a T helper 1 (Th-1) immune response has  
45 been associated with increased responsiveness to immunotherapy and favorable prognosis  
46 in some but not all cancer types. The reason of this differential prognostic connotation remains  
47 unknown. Through a multi-modal Pan-cancer analysis among 31 different histologies (9,282  
48 patients), we demonstrated that the favorable prognostic connotation conferred by the  
49 presence of a Th-1 immune response was abolished in tumors displaying specific tumor-cell  
50 intrinsic attributes such as high TGF- $\beta$  signaling and low proliferation capacity. This  
51 observation was validated in the context of immune-checkpoint inhibition. WNT- $\beta$  catenin,  
52 barrier molecules, Notch, hedgehog, mismatch repair, telomerase activity, and AMPK  
53 signaling were the pathways most coherently associated with an immune silent phenotype  
54 together with mutations of driver genes including *IDH1/2*, *FOXA2*, *HDAC3*, *PSIP1*, *MAP3K1*,  
55 *KRAS*, *NRAS*, *EGFR*, *FGFR3*, *WNT5A*, and *IRF7*. Our findings could be used to prioritize  
56 hierarchically relevant targets for combination therapies and to refine stratification algorithms.

57

58 **Keywords**

- 59 - Pan-cancer
- 60 - Immunologic Constant of Rejection
- 61 - Prognosis
- 62 - Mutational load
- 63 - Neoantigen load
- 64 - Aneuploidy
- 65 - Tumor intrinsic pathway enrichment
- 66 - Cancer Immunotherapy

## 67 Introduction

68 Evidence of the effects of anti-tumoral immunity on cancer progression has accumulated  
69 over the last decades. The identification of tumor immune escape mechanisms, most  
70 importantly the characterization of immune checkpoints, led to major advances in  
71 immunotherapy. Immune checkpoint inhibitors have dramatically improved clinical outcome  
72 for a subset of patients across multiple cancer types. Despite this progress, the majority of  
73 patients (60-80%) still fail to respond (Emens et al., 2017; Gong et al., 2018). Understanding  
74 the relationship between tumor cell and the immune system is critical to develop more effective  
75 therapeutic strategies.

76 A pre-existing intratumoral anti-tumor immune response has been associated with  
77 favorable outcome and responsiveness to immunotherapy (Galon et al., 2013). However,  
78 multiple studies have reported differences in the association between measures of  
79 intratumoral immune activity and survival across different cancer types (Charoentong et al.,  
80 2017; Danaher et al., 2018; Tamborero et al., 2018; Thorsson et al., 2018; Varn et al., 2017).  
81 In breast cancer, a positive association between survival and density of tumor infiltrating  
82 lymphocytes, as estimated by transcriptomic data, was restricted to tumors displaying a high  
83 mutational load or an aggressive/high proliferative phenotype (Miller et al., 2016; Nagalla et  
84 al., 2013; Thomas et al., 2018). Proposed transcriptome-based immunological classifications  
85 range from a measure of cytolytic activity by mean expression of *GZMA* and *PRF1* genes  
86 (Rooney et al., 2015), to reflections of immune cell infiltration by cell-specific transcriptional  
87 profiles (Bindea et al., 2013; Nagalla et al., 2013), or gene signatures reflecting molecular  
88 components of an active antitumor immune response, including Major Histocompatibility  
89 Complex (MHC), co-stimulatory or immunomodulatory molecules (Ayers et al., 2017;  
90 Charoentong et al., 2017; Wang et al., 2008). Reported prognostic and predictive signatures  
91 typically show overlapping genes or genes involved in conserved immunologic processes  
92 (Bedognetti et al., 2016, 2013; Galon et al., 2013; Wang et al., 2013b, 2013a). We termed  
93 these mechanisms as the Immunologic Constant of Rejection (ICR) (Galon et al., 2013; Wang  
94 et al., 2008). The ICR signature incorporates IFN-stimulated genes driven by transcription  
95 factors *IRF1* and *STAT1*, *CCR5* and *CXCR3* ligands, immune effector molecules, and counter-  
96 activated immune regulatory genes (Hendrickx et al., 2017; Turan et al., 2018; Wang et al.,  
97 2013b, 2008). Overall, the high expression of ICR typifies “hot”/immune active tumors  
98 characterized by the presence of a T helper 1 (Th-1)/cytotoxic immune response, as described  
99 in detail elsewhere (Bertucci et al., 2018; Galon et al., 2013; Hendrickx et al., 2017; Turan et  
100 al., 2018).

101 Previously, we observed a significantly prolonged survival of patients with tumors  
102 displaying a coordinated expression of ICR genes in breast cancer (Bertucci et al., 2018;  
103 Hendrickx et al., 2017). Moreover, we identified genetic determinants of different immune

104 phenotypes (Hendrickx et al., 2017). In particular, we reported that transcriptional  
105 dysregulation of the MAPK pathways sustained by genetic alterations (i.e., MAP3K1 and  
106 MAP2K4 mutations) are enriched in immune silent tumors (Hendrickx et al., 2017). We also  
107 observed that the ICR signature refines and improves the prognostic value of conventional  
108 prognostic signatures adopted in breast cancer (Bertucci et al., 2018). Here, we propose a  
109 systematic analysis of the entire TCGA cohort encompassing 31 different histologies. Using a  
110 pan-cancer approach, we identified novel relationships between tumor genetic programs and  
111 immune orientation. After having demonstrated differential associations between ICR  
112 classification and overall survival across cancer types, we systemically analyzed in which  
113 (molecular) contexts ICR has prognostic value and in which ones it does not. Combination of  
114 immune orientation with tumor intrinsic attributes that interact with its prognostic significance  
115 could refine tumor immunologic classifications. This approach was validated in the context of  
116 immune-checkpoint inhibition allowing better predictive precision.

## 117 **Results**

### 118 *Prognostic impact of ICR classification is different between cancer types*

119 RNA-seq data of samples from a total of 9,282 patients across 31 distinct solid cancer  
120 types were obtained from TCGA. To classify cancer samples based on their immune  
121 orientation, we performed unsupervised consensus clustering for each cancer type separately  
122 based on the expression of the ICR immune gene signature. This signature consists of 20  
123 genes that reflect activation of Th1-signaling (*IFNG*, *TXB21*, *CD8B*, *CD8A*, *IL12B*, *STAT1*, and  
124 *IRF1*), CXCR3/CCR5 chemokine ligands (*CXCL9*, *CXCL10*, and *CCL5*), cytotoxic effector  
125 molecules (*GNLY*, *PRF1*, *GZMA*, *GZMB*, and *GZMH*) and compensatory immune regulators  
126 (*CD274/PD-L1*, *PDCD1*, *CTLA4*, *FOXP3*, and *IDO1*) (**Figure 1A**) (Bedognetti et al., 2016;  
127 Galon et al., 2013; Hendrickx et al., 2017; Turan et al., 2018). Expression of these genes  
128 showed a positive correlation with each other across all cancer types (**Supplementary Figure**  
129 **1**). The ICR signature highly correlates with other immune signatures that aim to reflect a  
130 highly active immune tumor microenvironment, including the Tumor Inflammation Signatures  
131 (TIS) ( $r = 0.97$ ) (Danaher et al., 2018) (**Supplementary Figure 2**). As a representative  
132 example, consensus clustering and cluster assignment of skin cutaneous melanoma (SKCM)  
133 is shown in **Figure 1A**. Analogous figures for each of the 31 cancer types are available as  
134 cancer datasheets at [figshare.com](http://figshare.com).

135 As shown in **Figure 1B**, the mean expression of ICR genes, or ICR score, varies  
136 between cancer types, reflecting general differences in tumor immunogenicity between  
137 cancers. While brain tumors (brain lower grade glioma's (LGG) and glioblastoma multiforme  
138 (GBM)) typically display low immunological signals (McGranahan et al., 2017), skin cutaneous  
139 melanoma (SKCM) and head and neck squamous cell carcinoma (HNSC) display high levels  
140 of immune activation (Economopoulou et al., 2016; Passarelli et al., 2017; Thorsson et al.,  
141 2018). In addition, the distribution of ICR scores among patients and the difference between  
142 the highest and lowest ICR scores varies between cancers. Accordingly, the proportions of  
143 patients assigned to specific ICR clusters are dependent on the cancer type. Even more  
144 clinically relevant, the relation of the different immune phenotypes to survival is dissimilar  
145 among cancer types (**Figure 1C-D**). While the ICR High phenotype (hot) shows a significant  
146 survival benefit compared with the ICR Low phenotype (cold) for various cancer types (BRCA,  
147 SKCM, UCEC, SARC), the ICR High cluster is associated with significantly reduced overall  
148 survival in other cancer types (UVM, LGG, PAAD, KIRC) (**Figure 1C**). Similar results were  
149 obtained when Cox regression analysis was performed on ICR score as a continuous variable  
150 (**Supplementary Table 1**). To explore biological differences between cancer types in which a  
151 highly active immune phenotype is mostly associated with favorable survival and cancer types  
152 in which this phenotype is mostly associated with decreased survival, we categorized cancer  
153 types in ICR-enabled (BRCA, SKCM, UCEC, SARC, LIHC, HNSC, STAD, BLCA) and ICR-

154 *disabled* (UVM, LGG, PAAD, KIRC) groups, respectively (**Figure 1C**). All other cancer types  
155 in which ICR did not show an association or trend were categorized as *ICR-neutral*. Of  
156 important note, this classification was used for explorative purposes, a role of the immune  
157 mediated tumor rejection cannot be precluded in ICR-neutral cancer types.

158 First, we explored whether the ICR scores and their distributions were different among  
159 these defined groups of cancer types. Mean ICR score is low for most ICR-disabled (ranging  
160 from 3.97 to 8.34) compared to ICR-enabled cancer types (ranging from 7.26 to 8.36)  
161 (**Supplementary Figure 3A**). This observation is most noticeable for ICR-disabled cancer  
162 types LGG and UVM. Moreover, the difference (delta) between ICR scores in ICR High  
163 compared to ICR Low groups is higher in ICR-enabled cancer types (range: 2.98-4.97)  
164 compared to ICR-neutral (range: 1.48-4.49) and ICR-disabled cancer types (range: 2.29-3.35)  
165 (**Supplementary Figure 3B**). These factors could underlie, at least partially, the observed  
166 divergent associations with survival.

167 To define whether tumor pathologic stage might interact with the association between  
168 ICR and overall survival (OS), we fitted a Cox proportional hazards model for each group of  
169 ICR-enabled, ICR-neutral and ICR-disabled cancer types (**Table 1**). Overall, including ICR  
170 High and ICR Low samples from all cancer types, ICR has significant prognostic value  
171 independent of AJCC pathologic stage. For ICR-enabled cancer types, the ICR High group  
172 also remains significantly associated with improved survival after adjusting for tumor  
173 pathologic stage. For ICR-disabled cancer types, ICR High was associated with worse survival  
174 in univariate analysis (HR <1). However, in multivariate models this negative prognostic value  
175 of ICR was lost (HR=1.054; 95% CI= 0.7702- 1.443). Kaplan-Meier plots stratified by  
176 pathologic stage showed that within individual pathologic stages, ICR was not associated with  
177 OS for ICR-disabled cancers (**Supplementary Figure 4.1**). In fact, in the ICR-disabled tumors  
178 (but not in the ICR-enabled ones), ICR was significantly higher ( $p = 10 e^{-7}$ ) in advanced vs  
179 early stages (**Supplementary Figure 4.2**). Similarly, a progressive enrichment of ICR high  
180 samples was observed with more advanced stages in the ICR-disables tumors UVM and  
181 KIRC, and, in, LGG with more advanced grades.

182 For ICR-neutral cancer types, while ICR was not associated with survival in univariate  
183 analysis, multivariate analysis indeed identified a positive prognostic value of the ICR  
184 classification, though less robust than observed for ICR-enabled cancer types.



**A**

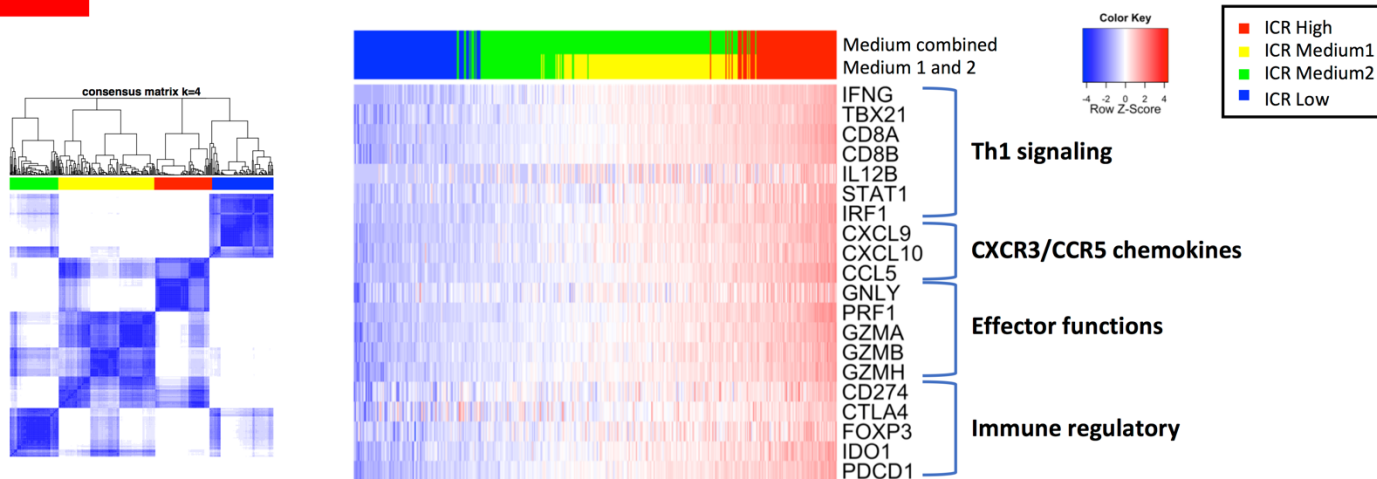

**B**

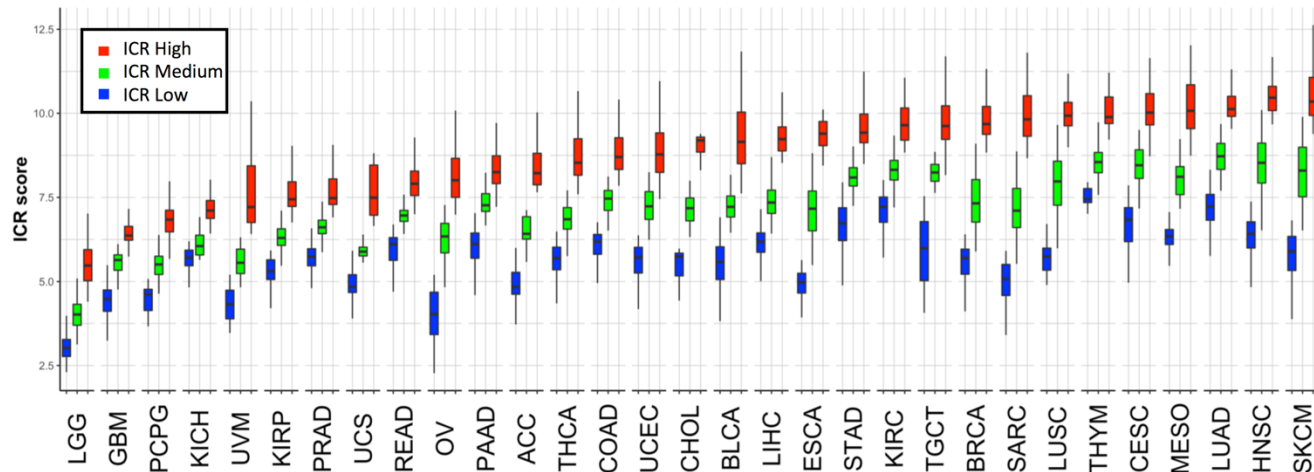

**C**

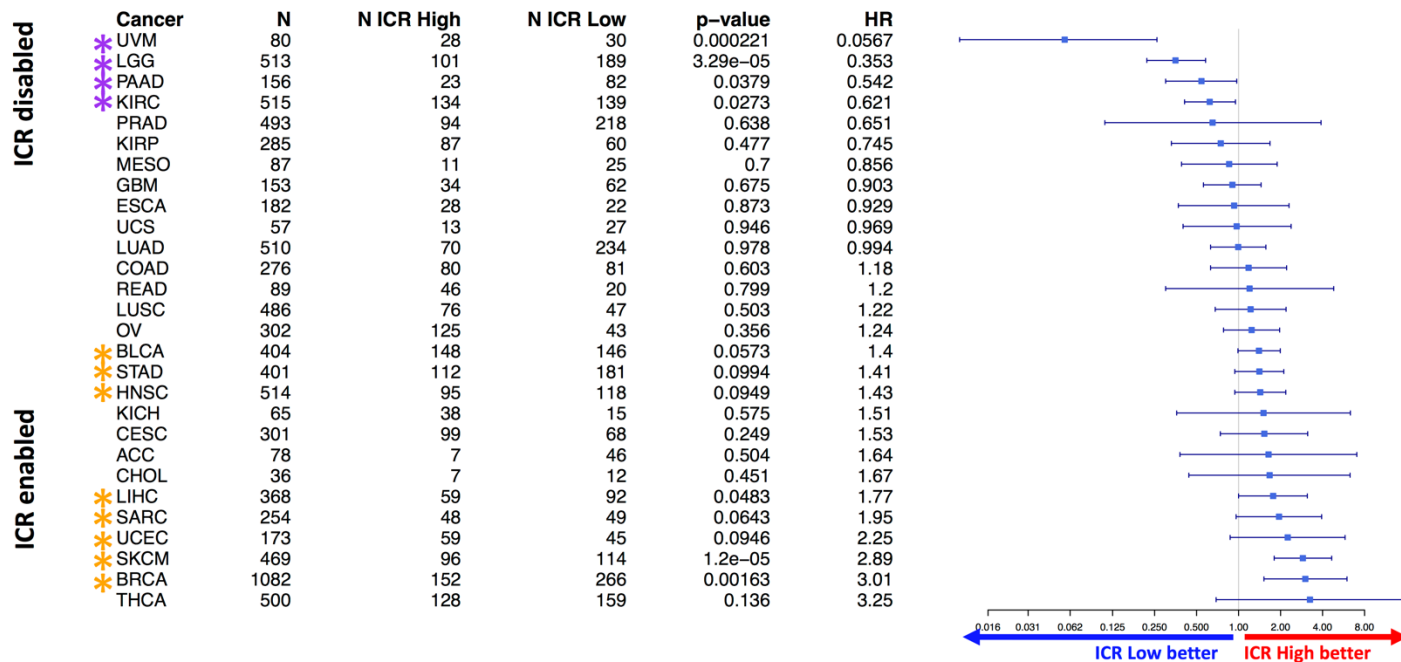

**D**

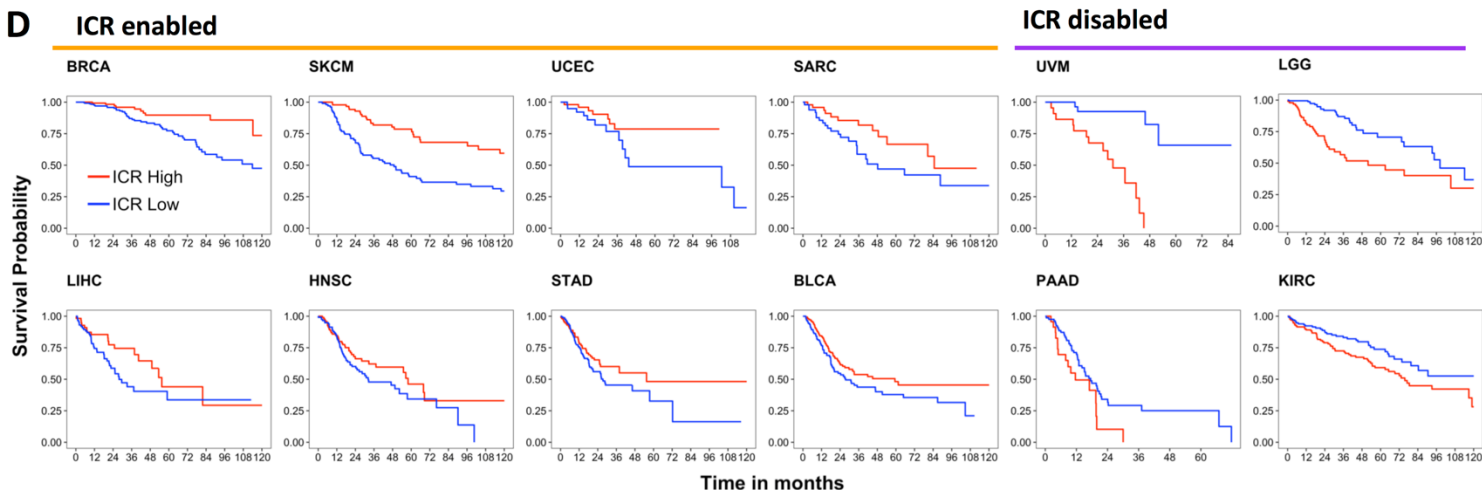



186 **Table 1.** Cox proportional hazards regression for association with overall survival in  
 187 ICR-enabled and ICR-disabled tumors: ICR High and ICR Low samples included  
 188 (ICR Medium samples excluded).  
 189  
 190  
 191

| Variables                                               | Univariable            |                 | Multivariable         |                 |
|---------------------------------------------------------|------------------------|-----------------|-----------------------|-----------------|
|                                                         | HR (95% CI)            | p               | HR (95% CI)           | p               |
| <i>ICR overall (n = 4735)</i>                           |                        |                 |                       |                 |
| ~ ICR cluster (ICR Low vs. High)                        | 1.203 (1.081-1.339)    | 0.00073<br>***  | 1.343 (1.180- 1.528)  | 7.85e-06<br>*** |
| ~ Pathologic stage (Stage I, II, III, IV)               | 1.72 (1.615-1.832)     | <2e-16<br>***   | 1.716 (1.611- 1.827)  | <2e-16<br>***   |
| <i>Samples from ICR-enabled cancer types (n = 1742)</i> |                        |                 |                       |                 |
| ~ ICR cluster (ICR Low vs. High)                        | 1.631(1.374-1.937)     | 2.26e-8<br>***  | 1.488 (1.233- 1.795)  | 3.35e-05<br>*** |
| ~ Pathologic stage (Stage I, II, III, IV)               | 1.817 (1.644-2.008)    | <2e-16<br>***   | 1.798 (1.628- 1.987)  | <2e-16<br>***   |
| <i>Samples from ICR-disabled cancer types (n = 721)</i> |                        |                 |                       |                 |
| ~ ICR cluster (ICR Low vs. High)                        | 0.6194 (0.4801-0.7992) | 0.000229<br>*** | 1.054 (0.7702- 1.443) | 0.742           |
| ~ Pathologic stage (Stage I, II, III, IV)               | 1.55 (1.351-1.778)     | 4.22e-10<br>*** | 1.560 (1.3520- 1.801) | 1.19e-9<br>***  |
| <i>Samples from ICR neutral cancer types (n = 2272)</i> |                        |                 |                       |                 |
| ~ ICR cluster (ICR Low vs. High)                        | 1.160 (0.983-1.369)    | 0.0789          | 1.336 (1.065- 1.676)  | 0.0122 *        |
| ~ Pathologic stage (Stage I, II, III, IV)               | 1.665 (1.5-1.848)      | <2e-16<br>***   | 1.640 (1.477- 1.821)  | <2e-16<br>***   |

192 Signif. codes: \*\*\* <0.001; \*\* <0.01; \* <0.05

193

194 ICR cluster entered as categorical (factor) variable (factor levels: "ICR High", "ICR Low")

195 Pathologic stage as semi-continuous variable (Stage I = 1; Stage II = 2; Stage III = 3; Stage IV = 4)

196 LGG and GBM were not included, as tumor stage is not available (not applicable) for these cancer

197 types.

198 *ICR reflects anti-tumor immune activity and is inversely correlated with tumor-related*  
199 *pathways associated with immune escape*

200 To further explore differences between cancer types, we aimed to compare the density  
201 of leukocyte subpopulations between ICR High and Low samples across cancers. Gene  
202 expression signatures specific to 24 cell types (Bindea et al., 2013) were used to deconvolute  
203 the abundance of immune cells in tumor samples by performing single sample gene set  
204 enrichment analysis (ssGSEA) (Barbie et al., 2009). Cell-specific enrichment scores (ES) for  
205 each patient demonstrated a clear enrichment of transcripts specific to T- and B cells in ICR  
206 High patients (**Figure 2A**). More specifically, ICR High samples showed increased expression  
207 of transcripts associated with cytotoxic T cells, T-regulatory (T-reg) cells, Th1 cells, NK  
208 CD56dim cells, activated dendritic cells (aDC) and macrophages, compared with ICR Medium  
209 and ICR Low samples. This observation is consistent across cancer types, in both ICR-  
210 enabled and ICR-disabled cancers. So, in addition to the immune functional molecular  
211 orientation, the ICR gene signature is a good reflection of anti-tumor immune cell infiltration  
212 (Lu et al., 2017). To quantitatively compare immune cell enrichment between individual cancer  
213 types, the mean ES was calculated for each cancer type (**Supplementary Figure 5**). Overall,  
214 no single consistent difference in terms of immune cell enrichment can be observed that can  
215 discriminate ICR-enabled from ICR-disabled cancer types. LGG and UVM show an overall  
216 low immune infiltration, consistent with our reported low ICR scores.

217 We then proceeded to examine which tumor intrinsic attributes correlate with immune  
218 phenotype as reflected by ICR gene expression. We performed ssGSEA to identify enrichment  
219 of transcripts of common tumor-related pathways (Hendrickx et al., 2017; Lu et al., 2017;  
220 Salerno et al., 2016). Not surprisingly, immune-related pathways including TNFR1 Signaling  
221 and immunogenic cell death showed a strong positive correlation with expression of ICR  
222 genes (**Figure 2B**). This implies that our immune signature captures the anti-tumoral  
223 immunological processes well across a wide range of cancer types. Interestingly, few  
224 pathways were identified that inversely correlated with ICR gene expression, potentially  
225 representing mechanisms by which immune silent tumors develop their phenotype. These  
226 pathways include WNT- $\beta$  catenin (Corrales et al., 2017; Spranger and Gajewski, 2015), barrier  
227 genes (Salerno et al., 2016), AMPK signaling (Dandapani and Hardie, 2013), mismatch repair,  
228 telomerase extension by telomerase, Notch, and Hedgehog, signaling pathways. Of special  
229 note, genes that we previously found to be upregulated in MAP3K1/MAP2K4-mutated vs wild-  
230 type (wt) breast cancer which perfectly segregated ICR High versus Low samples in the BRCA  
231 TCGA cohort (MAPK-up genes) (Hendrickx et al., 2017), were also inversely correlated with  
232 ICR in a significant proportion of cancers (i.e, ACC, THYM, GBM, LGG and TGCT).

# FIG2

**A**

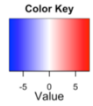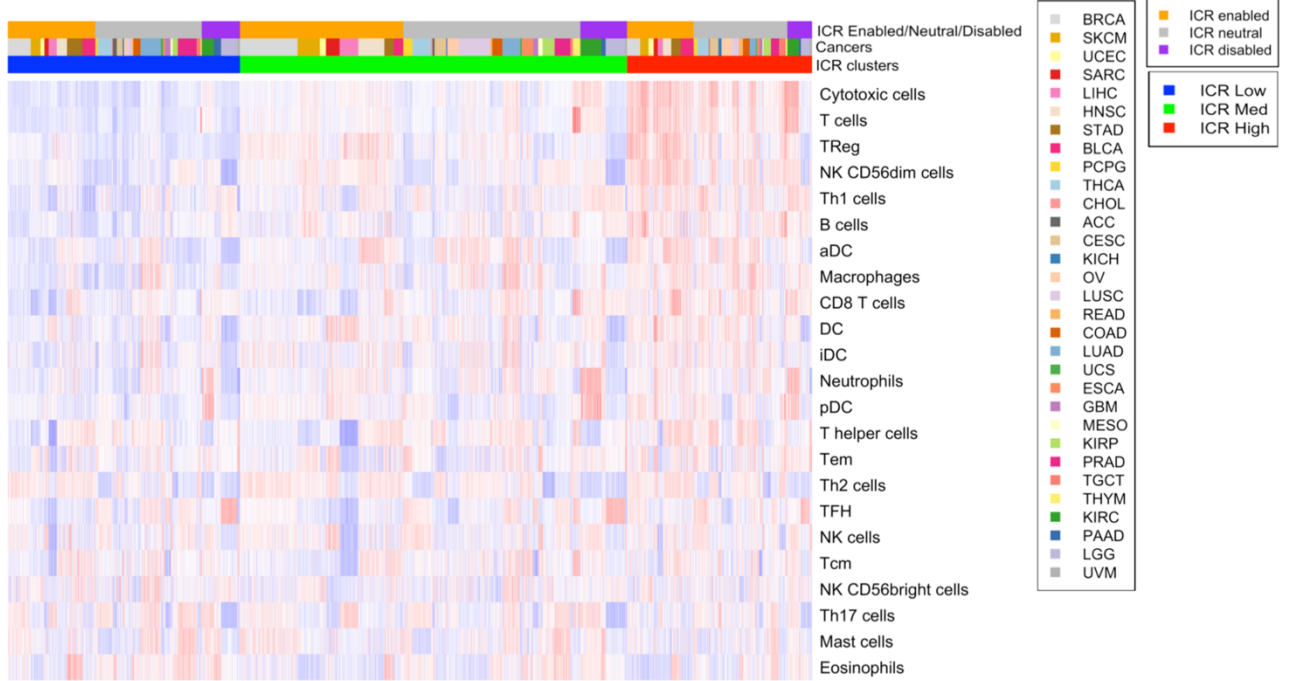

**B**

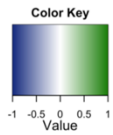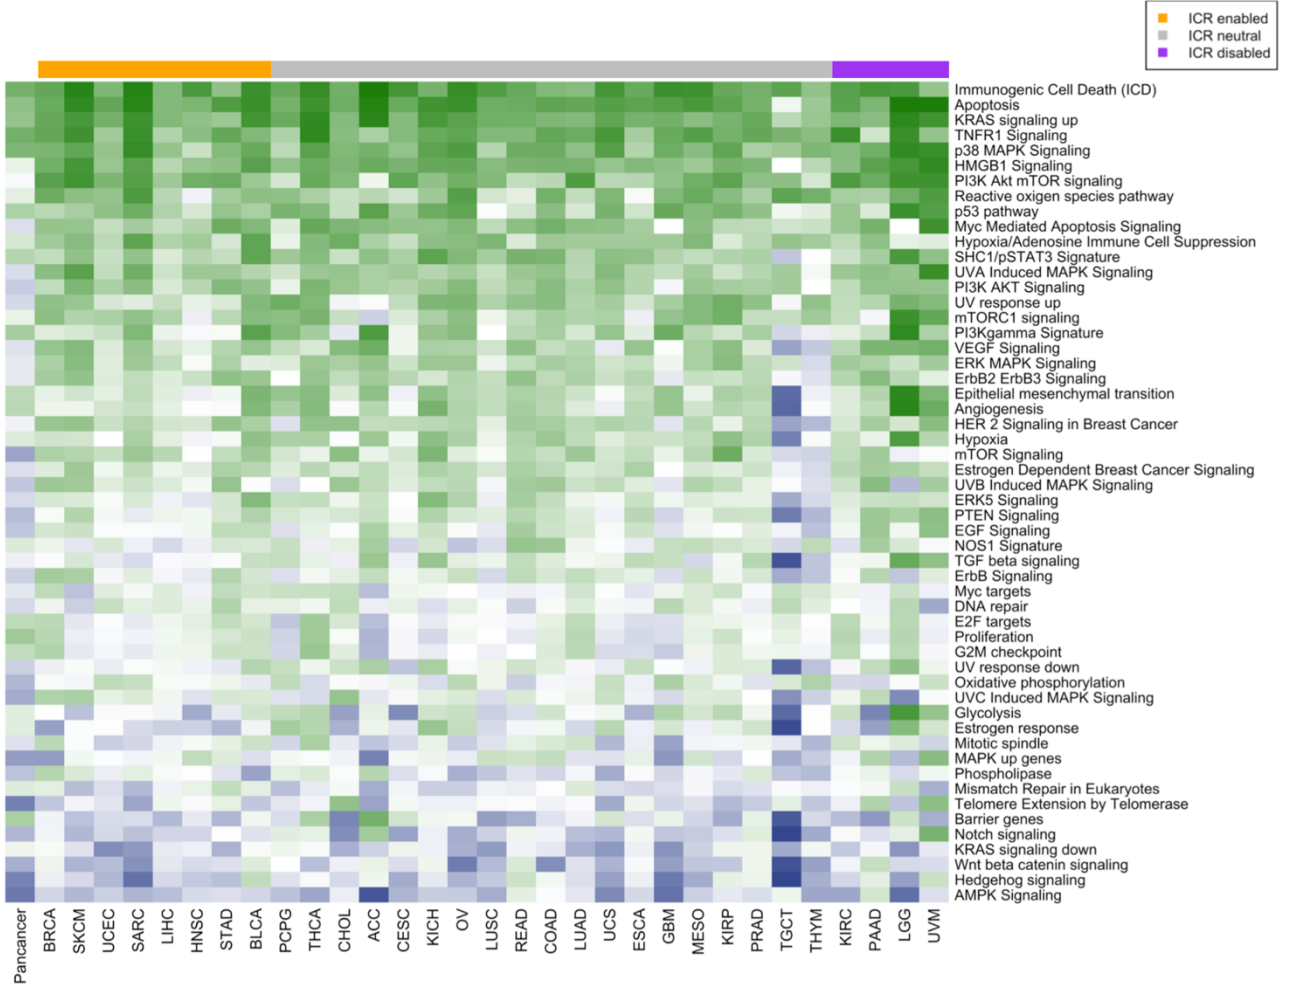

234 *Characterization of tumor mutational load and aneuploidy in relation to ICR immune*  
235 *phenotypes*

236         Next, we aimed to identify genomic attributes related to the ICR immune phenotypes.  
237 As previously observed (Thorsson et al., 2018), mean neoantigen count of each cancer type  
238 strongly correlated with mean mutation rate (**Supplementary Figure 6A-B**). While mean non-  
239 silent mutation rate was significantly higher in ICR High tumors for some cancer types, no  
240 clear association was observed in most of them. Results for predicted neoantigen load were  
241 similar (**Figure 3A-B** and **Supplementary Figure 6C-D**). Overall, mean non-silent mutation  
242 rate and mean neoantigen load were higher in ICR-enabled cancers compared with ICR-  
243 disabled cancers. However, these differences cannot fully explain the divergent association  
244 of ICR with survival, as values for ICR-enabled cancers SARC and BRCA are in the same  
245 range as ICR-disabled cancers LGG, PAAD and KIRC.

246         Similarly, we studied the association between genomic instabilities, or aneuploidy, and  
247 ICR. Specifically, we compared the individual tumor aneuploidy scores and the ICR score  
248 across cohorts. Aneuploidy score was calculated as in Taylor *et al* (Taylor et al., 2018). As  
249 has been reported previously, we found a broad negative association between aneuploidy and  
250 raw or tumor purity adjusted ICR score (Davoli et al., 2017) (**Figure 3C**). Interestingly, this  
251 negative association was most strongly supported in ICR-enabled cancers, with 6 cancers out  
252 of 8 showing a significant negative association between aneuploidy score and purity adjusted  
253 ICR ( $P < 0.01$ ). In ICR-neutral cancers, a small fraction of cancer types showed a negative  
254 association (4 of 18, with an additional 4 showing a non-significant but suggestive negative  
255 association). Three cohorts (GBM, KICH and PRAD) showed a suggestive positive  
256 association. Similarly, in the ICR-disabled cohorts only KIRC showed a significant negative  
257 association, while LGG showed a strongly significant positive association ( $p\text{-value} < 10^{-8}$ ).

**A**

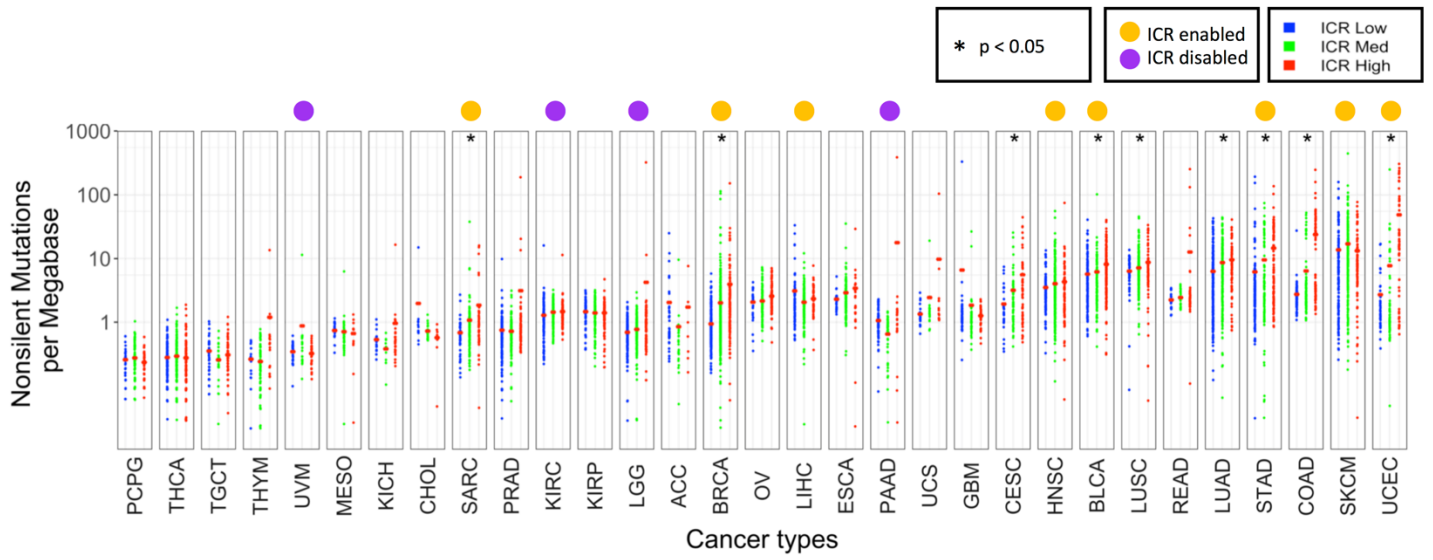

**B**

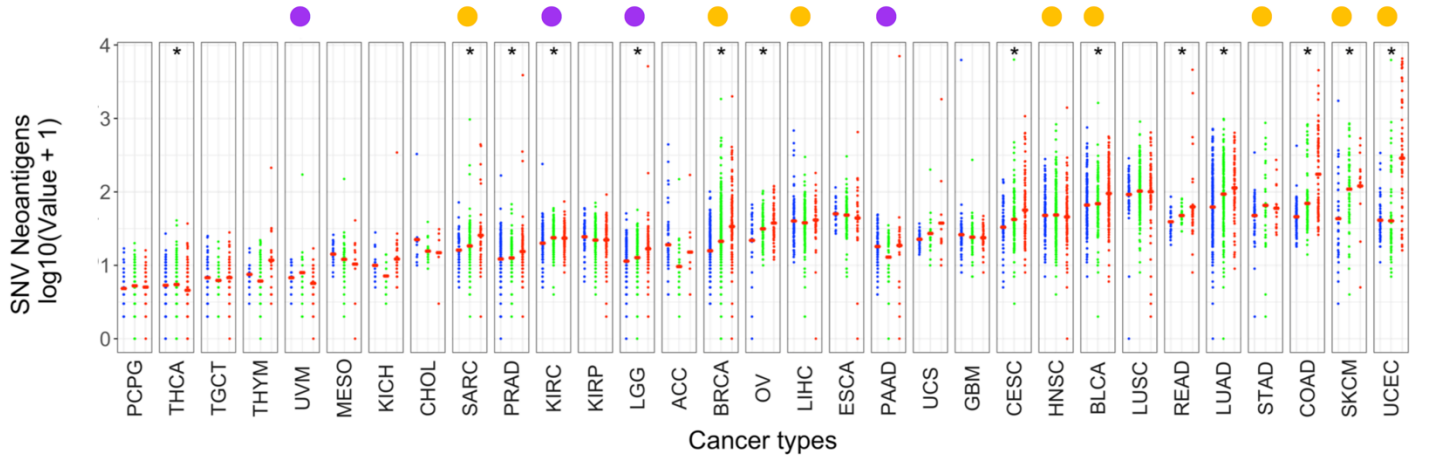

**C**

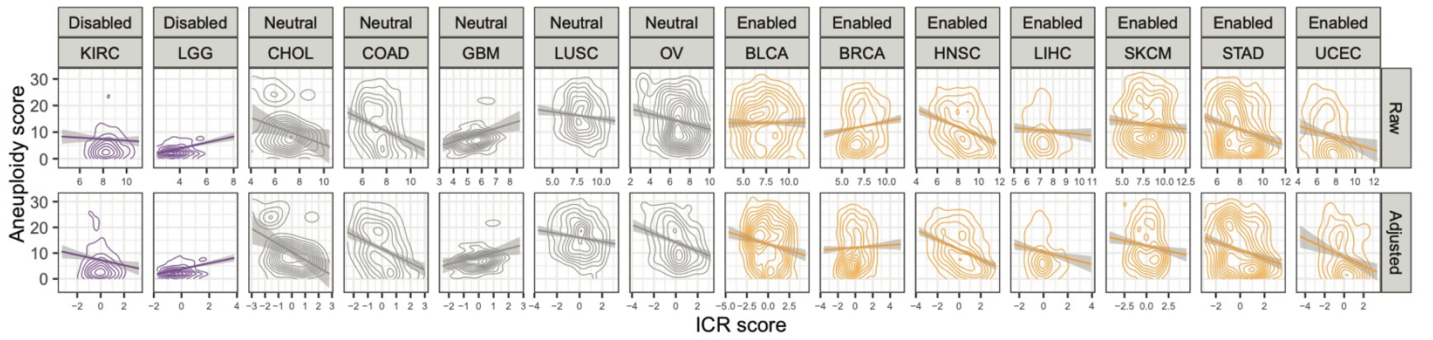

259 *Specific mutations associate with ICR immune phenotypes*

260 To define the association of specific oncogenic mutations with ICR immune  
261 phenotypes, we first selected a set of 470 frequently mutated genes in cancer (Iorio et al.,  
262 2016), then trained an elastic net (Zou and Hastie, 2005) model to predict the ICR score as  
263 function of mutations in each sample and using the tumor-type as covariate. The positive non-  
264 zero coefficients of the trained model were used to identify genes whose mutation are  
265 associated with an increase of the ICR and negative non-zero coefficients identify the genes  
266 whose mutations are associated to a decrease of the ICR score (**Figure 4A**). The use of  
267 tumor-type as covariate tends to limit the effect of the enrichment of mutations in specific  
268 cancer-types and their correlation with ICR score. The coefficients of the tumor-type were all  
269 different from zero, with the exception of BLCA, BRCA, CHOL, COAD, READ and SARC and  
270 retained in the final model. We evaluated the accuracy of the model in a ten-fold cross-  
271 validation computing the correlation between the model prediction and the true ICR scores  
272 and obtaining a Spearman correlation of  $0.669 \pm 0.012$  (p-value  $< 10^{-400}$ ). Genes associated  
273 with a decrease of ICR score include: *FOXA2*, *NSD1*, *PSIP1*, *HDAC3*, *ZNF814*, *FRG1*,  
274 *SOX17*, *CARM1*, *GATA3*, *FKBP5*, *FGFR3*, *MAT2A*, *PPP2R5A*, *MECOM*, *SMAD2*, *MED17*,  
275 *WNT5A*, *KRAS*, *ADAM10*, *PRKAR1A*, *DIS3*, *PRRX1*, *MFNG*, *TNPO1*, *SPOP*, *KDM6A*, *EGFR*,  
276 *IRF7*, *NRAS*, *SUZ12*, *RPSAP58*, and *SF3B1*.

277 Interestingly MAP3K1 mutations, whose effect on ICR Low has been described in  
278 breast cancer (Hendrickx et al., 2017), were also associated to ICR Low tumors pan-cancer.  
279 The top genes of which mutations positively correlate with ICR reflect immune-evasion  
280 mechanisms that follow immunologic pressure such as mutations of antigen-presenting  
281 machinery transcripts previously described (i.e., *B2M*, *HLA-A*, *HLA-B*, and *CASP8*)(Rooney  
282 et al., 2015).

283 To better compare the association between specific mutations and ICR groups within  
284 individual cancer types, we calculated, for each of the identified genes, the mean ICR score  
285 in the mutated group divided by the mean ICR score in the wild type (WT) within each  
286 individual cancer type. For most cancer types, the genes with a positive coefficient consistently  
287 showed a higher ICR score in mutated samples, supporting their association with an ICR High  
288 phenotype (**Figure 4B**). On the other hand, genes with a negative coefficient (genes  
289 associated with an ICR Low phenotype) as identified at the pan-cancer level, do show some  
290 clear deviations between cancer types. While for most cancer types, ICR score is indeed lower  
291 in the mutated group, results for cancer types COAD, UCEC and STAD show the reverse  
292 (**Figure 4B**). Interestingly, a common characteristic of these three cancer types is frequent  
293 hypermutation as a consequence of microsatellite instability (MSI) (Cortes-Ciriano et al.,  
294 2017). This hypermutator phenotype could be responsible for the observed increased ICR  
295 score in the mutated group, as the genes with negative coefficient could be mutated in the



296 context of hypermutation. We indeed observed an increased ICR score in the MSI-high group  
297 compared to MSI-low and microsatellite stable (MSS) groups in COAD and STAD datasets  
298 for which sufficient data on MSI status were available (Cortes-Ciriano et al., 2017)  
299 (**Supplementary Figure 7A-B**).

300 Mutated genes were frequently part of multiple pathways, suggesting impact on  
301 various tumor biological systems (**Supplementary Figure 8**).



A

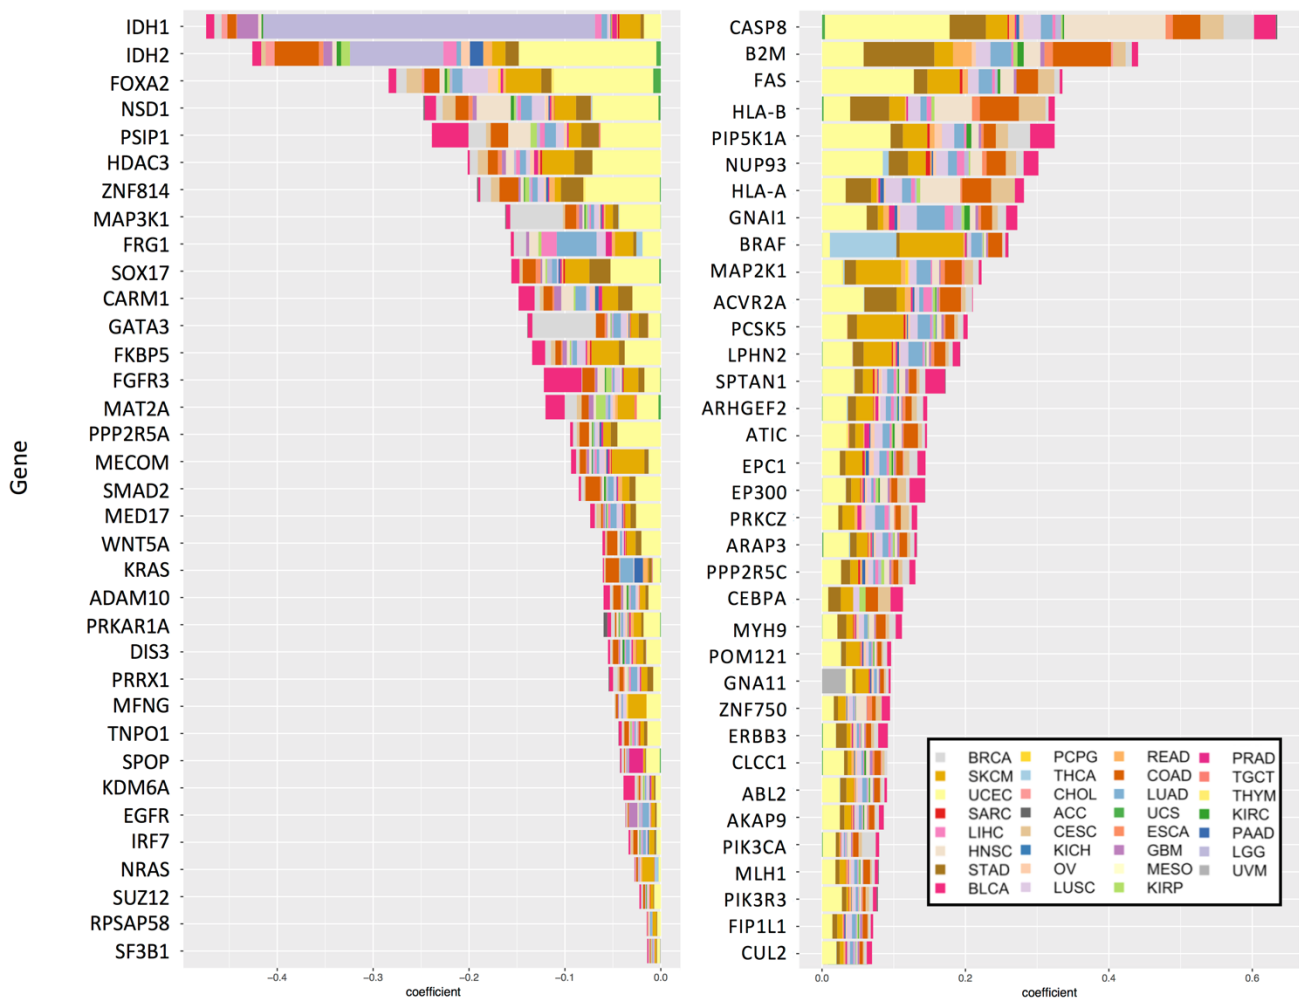

B

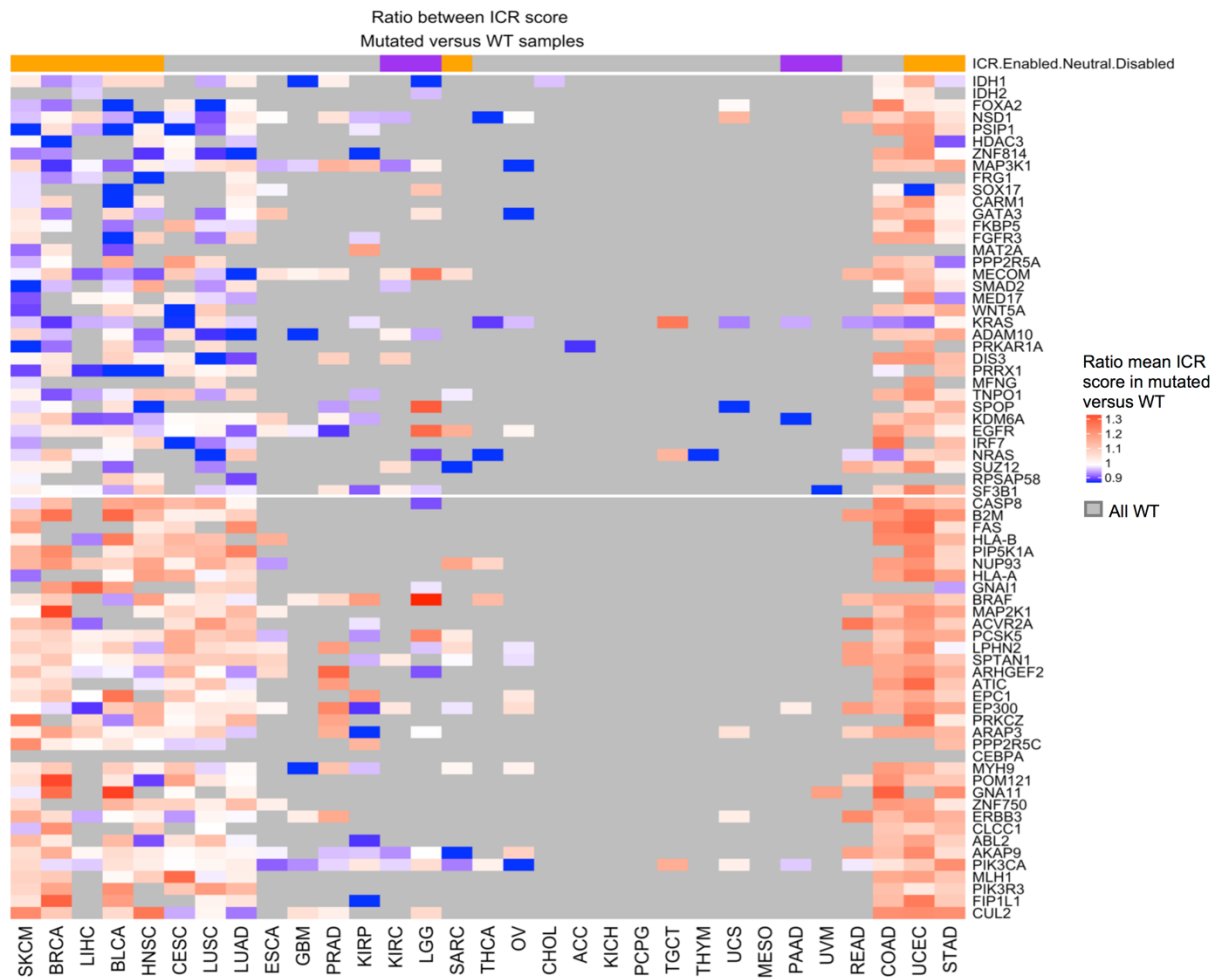

303 *Prognostic impact of ICR classification is dependent on the expression of cancer-related*  
304 *pathways*

305       Although we observed interesting differences between ICR High and ICR Low immune  
306 phenotypes across different cancer types, these do not explain the divergent association  
307 between immune phenotype and survival as we observed in ICR-enabled versus ICR-disabled  
308 cancer types (**Figure 1C-D**). As previously stated, an active immune phenotype has different  
309 impacts on survival depending on molecular subtype (for e.g. breast cancer (Miller et al.,  
310 2016)). To examine tumor intrinsic differences between ICR-enabled and ICR-disabled cancer  
311 types, we compared the enrichment of tumor intrinsic pathways between these two groups.  
312 Differentially enriched pathways (t-test; FDR <0.05; **Supplementary Table 2**) between ICR-  
313 enabled and disabled cancer types were selected and used for pan-cancer hierarchical  
314 clustering. Interestingly, a wide variety of pathways were differentially enriched between both  
315 groups. Whereas enrichment for pathways involved in proliferation were mostly upregulated  
316 in ICR-enabled cancer types (proliferation metagene (Miller et al., 2016), E2F targets, G2M  
317 checkpoints and mismatch repair), a large number of tumor intrinsic pathways (n=43) were  
318 enriched in ICR-disabled cancer types. Visualization of ES for these pathways across different  
319 cancer types in a heatmap confirms these findings. Hierarchical clustering based on ES of  
320 tumor intrinsic pathways differentially dysregulated by ICR-enabled and ICR-disabled cancer  
321 types segregates specimens into two main clusters (**Figure 5A**). As anticipated, pan-cancer  
322 survival analysis of all samples that formed a cluster along with samples of the ICR-disabled  
323 cancer types, named the *ICR non-beneficial cluster*, revealed no survival benefit of a high ICR  
324 expression. On the other hand, survival analysis of all samples in the other cluster, named the  
325 *ICR beneficial cluster*, showed a clear survival benefit for ICR High samples (**Figure 5B**). Of  
326 note, the prognostic significance of ICR was higher in this ICR beneficial cluster (HR = 1.82;  
327 p-value = 4.13<sup>-9</sup>; 95% CI = 1.49-2.23) compared to the prognostic significance of all samples  
328 of ICR-enabled cancer types combined (HR = 1.63, p = 2.26<sup>-8</sup>; 95% CI = 0.88-1.14),  
329 suggesting that tumor intrinsic attributes beyond the tumor site of origin are important to  
330 determine the relevance of cancer immune phenotypes. Interestingly, samples from ICR-  
331 neutral cancers, in which no clear trend was observed between ICR and survival (**Figure 1C**),  
332 and which were not used in calculation of differentially enriched pathways, were divided across  
333 the *ICR beneficial* and *ICR non-beneficial clusters*. To evaluate whether the prognostic impact  
334 of the ICR was relevant to a subset of samples from ICR-neutral cancer types, subgroup  
335 analysis was performed for samples of ICR-neutral cancer types. Indeed, for all samples from  
336 ICR-neutral cancer types that clustered to the *ICR non-beneficial cluster*, ICR was not  
337 associated with survival. On the other hand, for samples of ICR-neutral cancer types which  
338 clustered to the *ICR beneficial cluster*, ICR showed a significant positive association with

339 survival (**Figure 5C**), indicating that the ICR has prognostic relevance in this subgroup of  
340 cancer patients as well.

**FIG5**

**A**

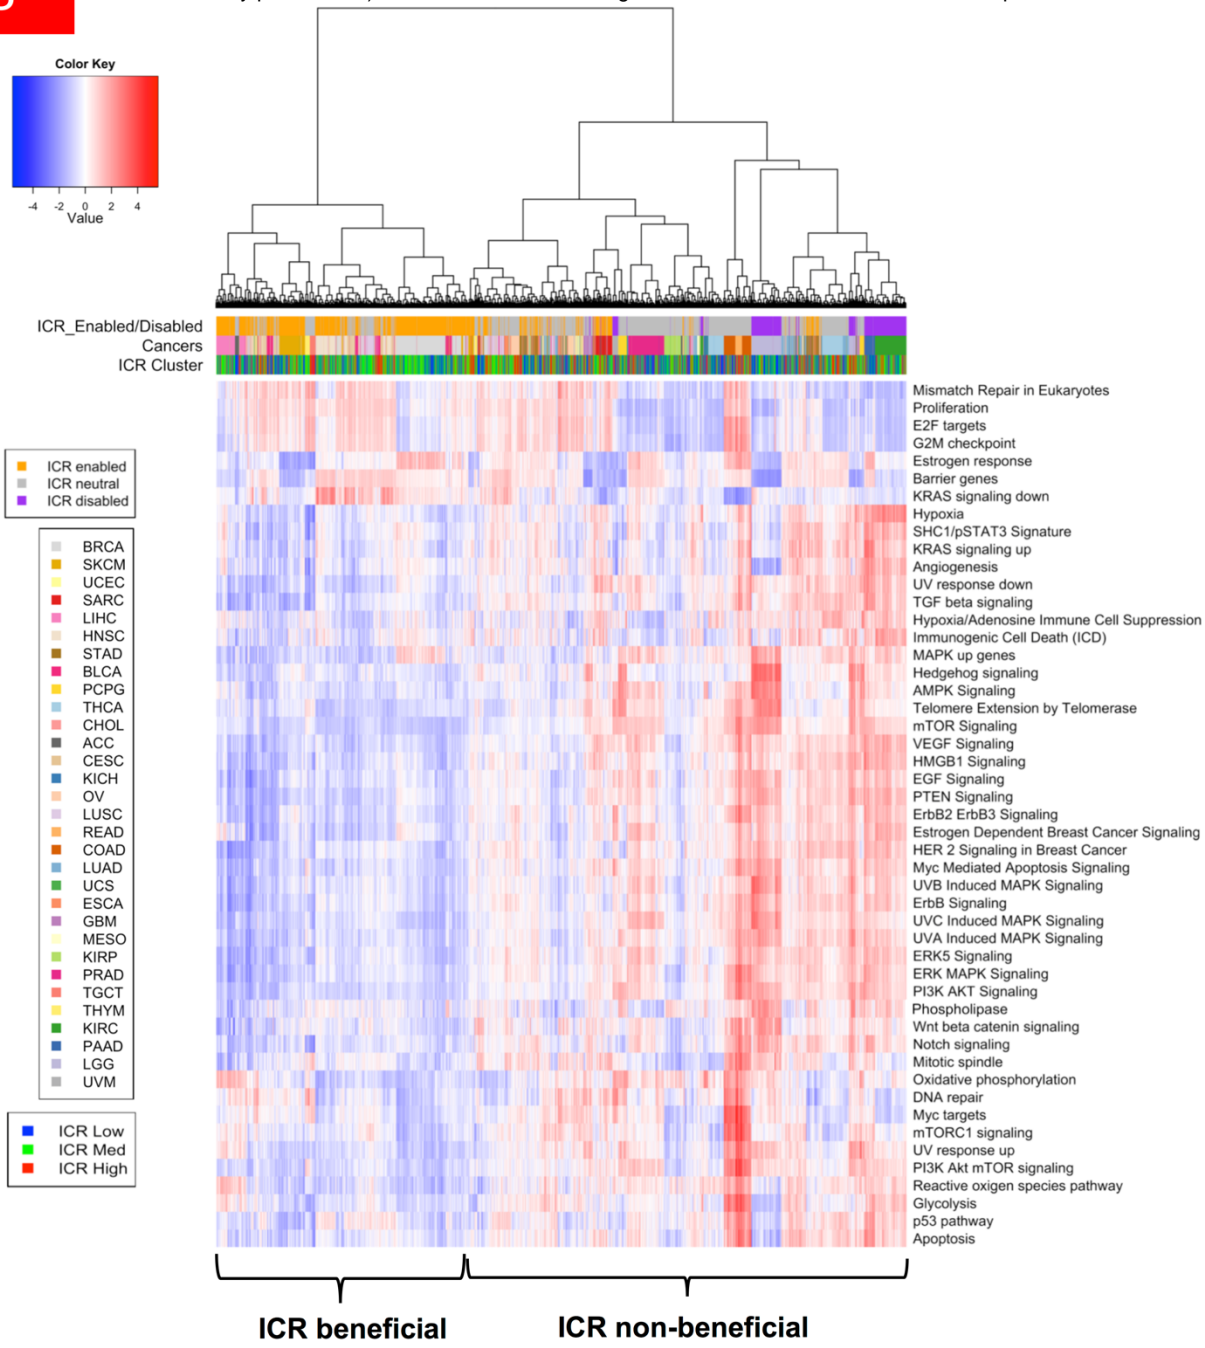

**B**

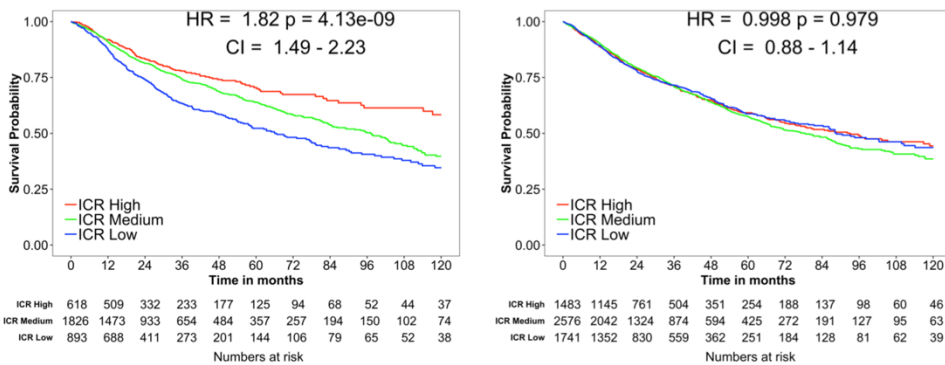

**C**

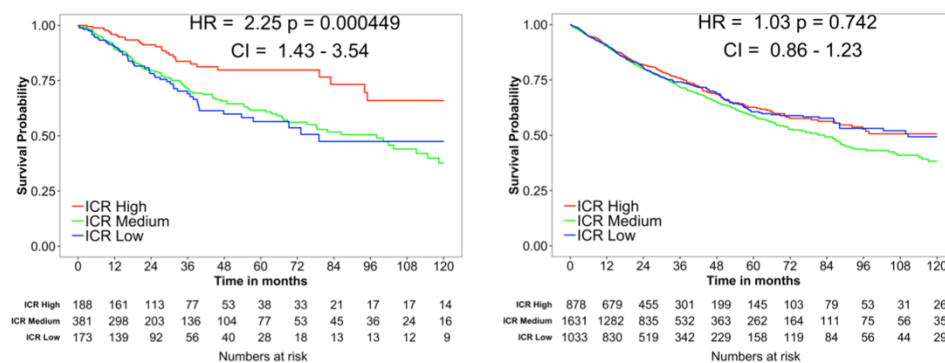

343 To better clarify this concept, we selected two of the differentially expressed pathways  
344 that were of special interest. Firstly, the “Proliferation” signature was used to classify all  
345 samples independent of tumor origin in “Proliferation High” and “Proliferation Low” categories,  
346 defined as an ES value >median or <median of all samples, respectively. This 52-gene cluster  
347 described by Nagalla *et al* (Nagalla et al., 2013) has previously been associated with the  
348 prognostic value of immune gene signatures in breast cancer (Miller et al., 2016). As  
349 represented by a histogram, the proportion of samples with high proliferation signature  
350 enrichment was larger in ICR-enabled cancer types compared with ICR-disabled cancers  
351 (**Figure 6A**). This very basic binary classification was already capable of segregating samples  
352 in a group in which ICR has a positive prognostic value from a group in which ICR is not  
353 associated with survival (**Figure 6B**). As a second illustration, “TGF- $\beta$  signaling” was used to  
354 classify samples based on this pathway using the same approach. For this oncogenic  
355 pathway, ICR-enabled cancer types typically had a lower enrichment of this pathway  
356 compared to ICR-disabled cancer types (**Figure 6C**). This classification could also divide  
357 samples in a group in which ICR has a positive association with survival and a group in which  
358 this association is absent (**Figure 6D**).

359 As proliferation positively correlates with tumor mutational load (Pearson’s correlation  
360 coefficient = 0.49) (**Supplementary Figure 9**), we investigated whether tumor proliferation  
361 independently contributes to the prognostic value of ICR. Therefore, we segregated pan-  
362 cancer samples in four categories based on both mutation rate and proliferation  
363 (**Supplementary Figure 10**). Interestingly, in the proliferation high group, ICR High was  
364 associated with significantly improved survival independent of mutation rate. A similar  
365 observation is made for the mutation rate high group, ICR High is associated with better  
366 survival independent of proliferation. These findings suggest that mutation rate and enrichment  
367 of proliferation-related transcripts provide additive information to define the prognostic value  
368 of ICR. Furthermore, in a multivariate Cox proportional hazards model including ICR  
369 classification, proliferation enrichment, TGF- $\beta$  signaling enrichment, and tumor mutation rate,  
370 all parameters remain significant (**Supplementary Figure 11**). This implies that ICR,  
371 proliferation rate, TGF- $\beta$  signaling and tumor mutation rate all have independent prognostic  
372 value.

373 We then continued by verifying whether these tumor intrinsic attributes that interact  
374 with the prognostic impact of ICR when evaluated pan-cancer, could also translate to  
375 individual cancer types. For each individual cancer type, samples were divided by median ES  
376 for each of the selected pathways. ICR HRs (ICR Low vs. ICR High) were compared between  
377 each pathway-High and pathway-Low group for each cancer type (**Supplementary Figure**  
378 **S12A-B**). Overall, we indeed observed an increased HR for samples with a high enrichment

379 of ICR enabling pathways for most cancer types. For samples with a high enrichment of ICR  
380 disabling pathways, the HR was indeed lower (**Supplementary Figure S12C**).

381         These data confirm an association between the prognostic impact of ICR classification  
382 and enrichment of oncogenic pathways in individual cancer types as well as pan-cancer. Of  
383 note, these interactions between the prognostic significance of ICR and tumor intrinsic  
384 pathways were mostly present in enabled and neutral cancer types. Within disabled cancer  
385 types, with the exception of KIRC, similar associations were not found.

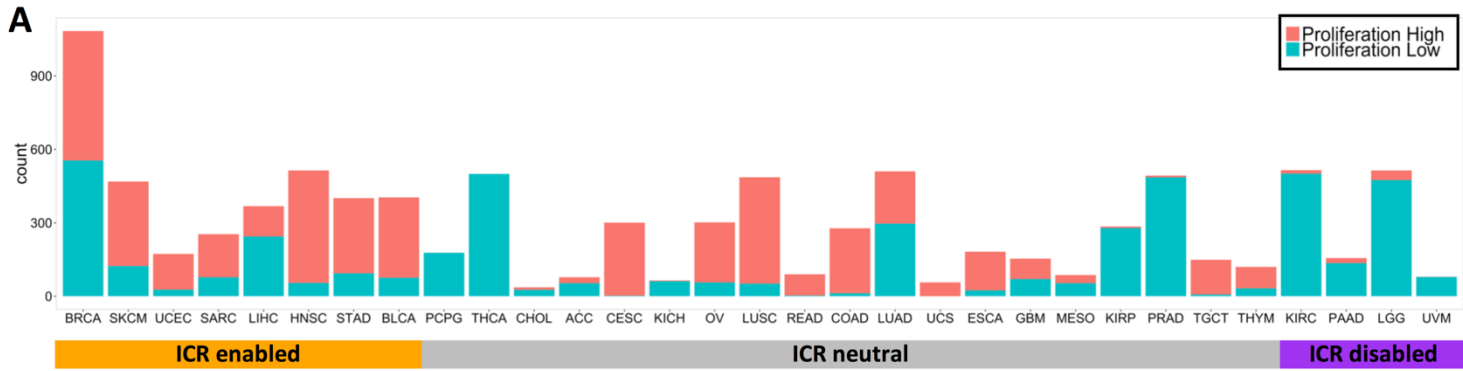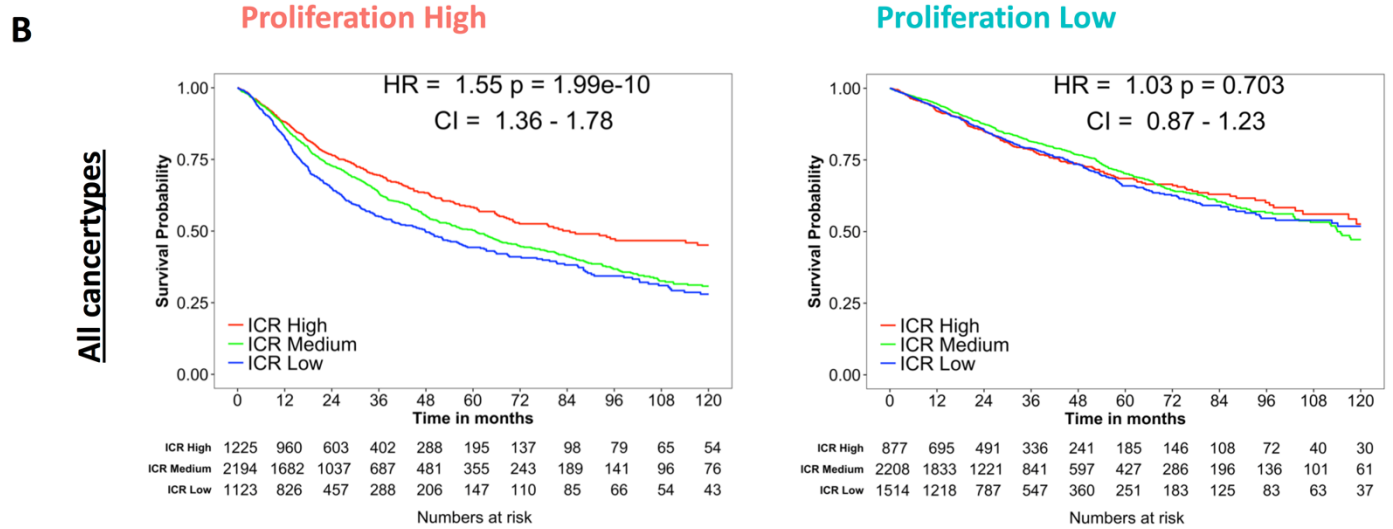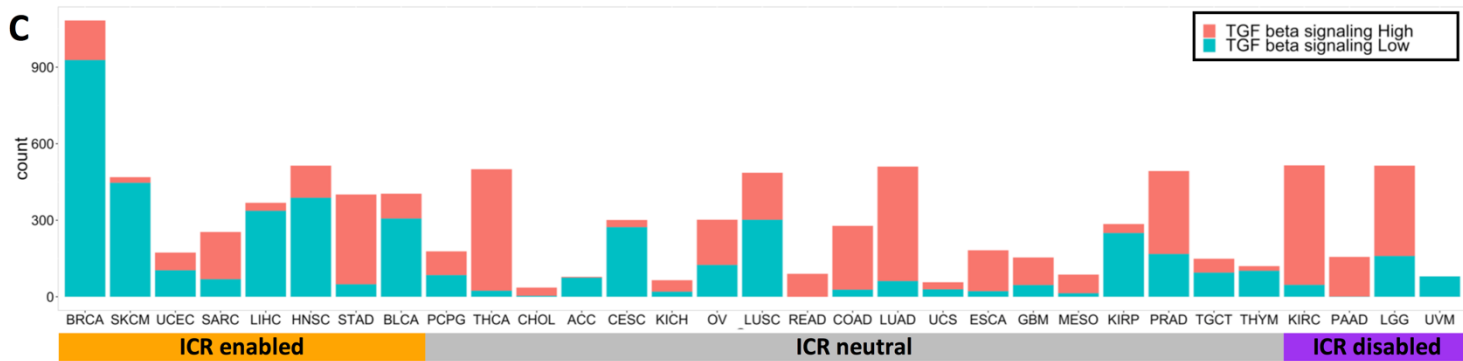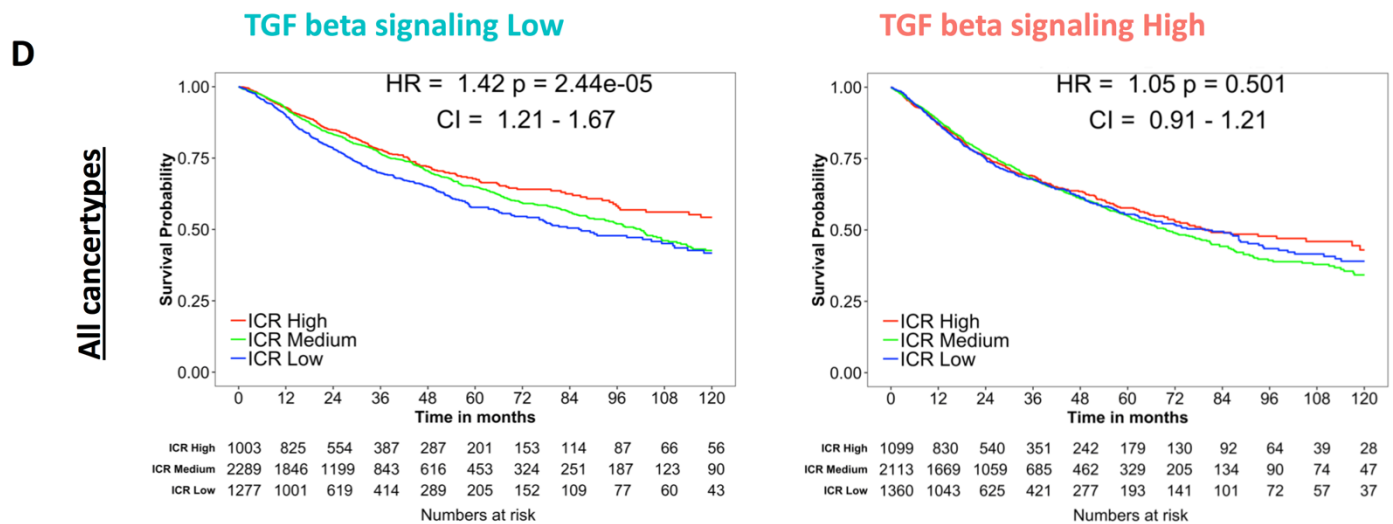



387 *Predictive value of ICR score in immune checkpoint therapy is dependent on proliferation and*  
388 *TGF- $\beta$  signaling*

389 To define the clinical relevance of classification of ICR immune phenotypes, in the  
390 setting of immune checkpoint treatment, we first evaluated the predictive value of ICR score  
391 across multiple public datasets of anti-CTLA4 and anti-PD1 treatment. A significantly  
392 increased expression of ICR in responders compared to non-responders was observed across  
393 most of the datasets (**Figure 7A**) (Chen et al., 2016; Hugo et al., 2016; Prat et al., 2017; Riaz  
394 et al., 2017; Van Allen et al., 2015). The conditional activation of the prognostic impact of the  
395 ICR was tested in the Van Allen dataset, which was the only one for which survival information  
396 was available. Strikingly, in the proliferation high subgroup, ICR score was significantly higher  
397 in pre-treatment samples of patients with long-survival or response ( $p=0.021$ ), whereas this  
398 difference was not significant in proliferation low samples (**Figure 7B**). Cohort dichotomization  
399 based on TGF- $\beta$  signaling, again demonstrated the reverse trend: a significant difference in  
400 ICR score was only observed in the TGF- $\beta$  signaling low group ( $p=0.0044$ ), not in the TGF- $\beta$   
401 high group. Stratified survival analysis in these categories confirmed that the prognostic  
402 impact of ICR depends on proliferation and TGF- $\beta$  signaling (**Figure 7C**). These findings  
403 confirm a conditional prognostic and predictive impact of ICR based immune infiltration  
404 estimates in the setting of immune checkpoint treatment and demonstrate that these findings  
405 might have important clinical implications.

**A**

| Study                 | Platform   | Treatment type | Time of biopsy | ICR score in Responders > non-responders | p value       |
|-----------------------|------------|----------------|----------------|------------------------------------------|---------------|
| van Allen             | RNASeq     | anti-CTLA4     | pre-treatment  |                                          | 0.024 (*)     |
| Chen et al            | Nanostring | anti-CTLA4     | pre-treatment  |                                          | 0.95          |
|                       |            | anti-CTLA4     | on-treatment   |                                          | 0.028 (*)     |
| Riaz et al (GSE91061) | RNASeq     | anti-PD1       | pre-treatment  |                                          | 0.69          |
|                       |            | anti-PD1       | on-treatment   |                                          | 0.00054 (***) |
| Hugo et al (GSE78220) | RNASeq     | anti-PD1       | pre-treatment  |                                          | 0.14          |
| Prat et al            | Nanostring | anti-PD1       | pre-treatment  |                                          | 0.015 (*)     |
|                       |            |                |                |                                          | 0.92          |
|                       |            |                |                |                                          | 0.05 (*)      |

**B**

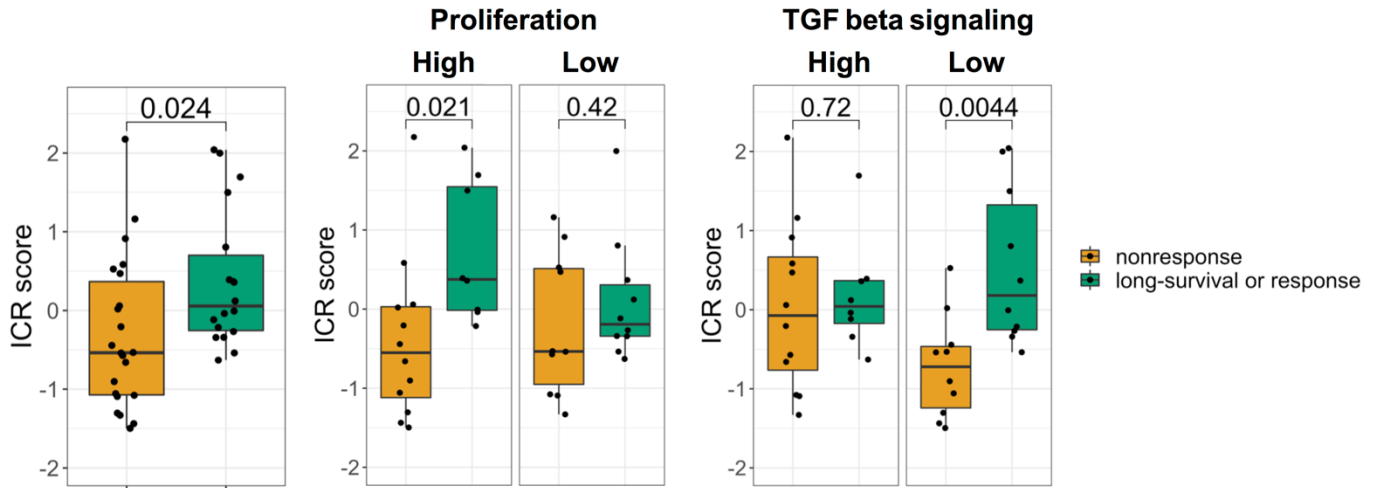

**C**

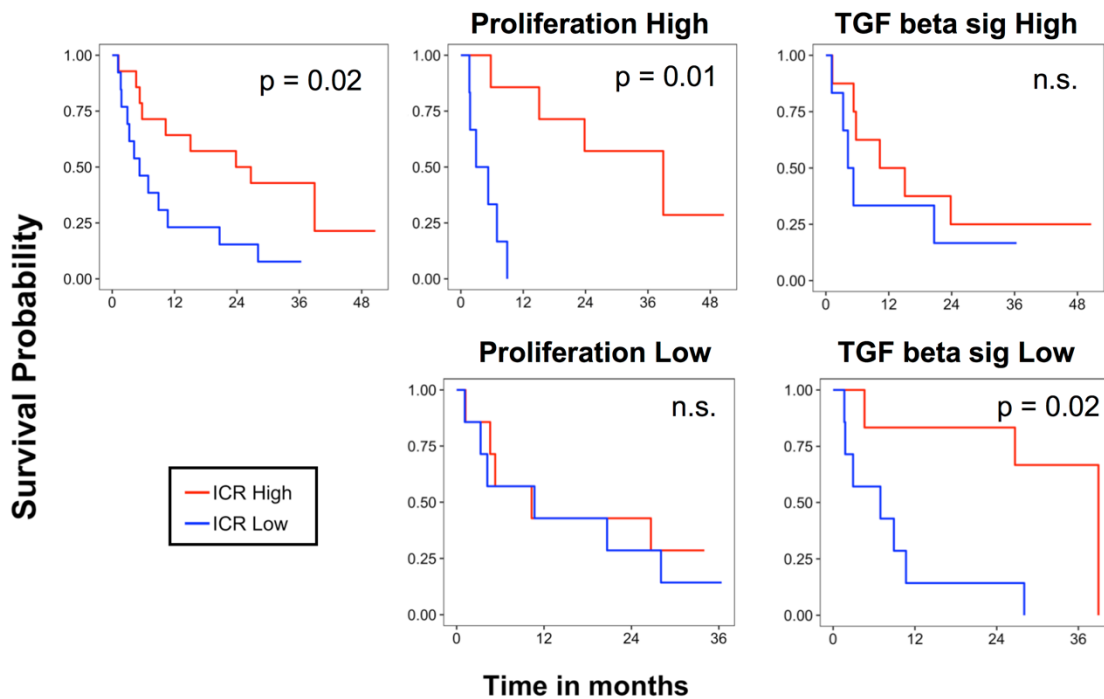

## 408 **Materials and Methods**

409

### 410 *Data acquisition and normalization*

411 RNA-seq data from The Cancer Genome Atlas (TCGA) were downloaded and processed  
412 using TCGA Assembler (v2.0.3). Gene symbols were converted to official HGNC gene  
413 symbols and genes without symbol or gene information were excluded. RNA-seq data from  
414 as wide as possible sample set of the total of 33 available cancer types of tissue types Primary  
415 Solid Tumor (TP), Recurrent Solid Tumor (TR), Additional-New Primary (TAP), Metastatic  
416 (TM), Additional Metastatic (TAM) and Solid Tissue Normal (NT) were used to generate a *pan-*  
417 *cancer* normalized dataset. Normalization was performed within lanes, to correct for gene-  
418 specific effects (including GC-content and gene length) and between lanes, to correct for  
419 sample-related differences (including sequencing depth) using R package EDASeq (v2.12.0)  
420 and quantile normalized using preprocessCore (v1.36.0). After normalization, samples were  
421 extracted to obtain a single primary tumor tissue (TP) sample per patient. For SKCM patients  
422 without available TP sample, a metastatic sample (TM) was included. Finally, the pan-cancer  
423 normalized dataset was filtered to remove duplicate patients and samples that did not pass  
424 assay-specific QCs (Thorsson et al., 2018) data was log<sub>2</sub> transformed. Clinical data were  
425 sourced from the TCGA Pan-Cancer Clinical Data Resource (Liu et al., 2018). Mutation rate  
426 and predicted neoantigen load were obtained from the recent immunogenomic analysis by  
427 Thorsson *et al* (Thorsson et al., 2018). The dataset published by Ellrott *et al* was used for  
428 mutation data analysis(Ellrott et al., 2018). Hematological cancer types LAML and DLBC were  
429 excluded from analysis.

430 Raw fastq files of datasets GSE78220 (Hugo et al., 2016) and GSE78220 (Riaz et al.,  
431 2017) were downloaded from NCBI SRA servers, quality control and adapter trimming was  
432 performed using Trim\_Galore (<https://github.com/FelixKrueger/TrimGalore>). Reads were  
433 aligned to hg19 using STAR (Dobin et al., 2013). GenomicFeatures and GenomicAlignments  
434 Bioconductor packages were used to generate row counts. The raw counts were normalized  
435 with EDASeq (Risso et al., 2011) and log<sub>2</sub> transformed. The dataset phs000452.v2.p1 (Van  
436 Allen et al., 2015) was downloaded, already normalized, from <http://tide.dfci.harvard.edu/>.

437

### 438 *ICR classification*

439 Consensus clustering based on the 20 ICR genes (**Figure 1A**) was performed for each cancer  
440 type separately using the ConsensusClusterPlus (v1.42.0) R package with the following  
441 parameters: 5,000 repeats, a maximum of six clusters, and agglomerative hierarchical  
442 clustering with ward criterion (Ward.D2) inner and complete outer linkage. The optimal number  
443 of clusters ( $\geq 3$ ) for best segregation of samples based on the ICR signature was determined  
444 heuristically using the Calinski-Harabasz criterion(Caliński and Harabasz, 1974) ([source](#)

445 [function](#) available on GitHub repository, see cancer datasheets for plots with local maximum).  
446 As we were interested to compare cancer samples with a highly active immune phenotype  
447 with those that have not, the cluster with the highest expression of ICR genes was designated  
448 as “ICR High”, while the cluster with the lowest ICR gene expression was designated “ICR  
449 Low”. All samples in intermediate cluster(s) were defined as “ICR Medium”. Samples were  
450 annotated with an ICR score, defined as the mean of the normalized, log2 transformed  
451 expression values of the ICR genes. For generation of the ICR Heatmaps (**Figure 1C** and the  
452 cancer datasheets), a modified version of heatmap.3 function was used ([source function](#)).

453

#### 454 *Survival analysis*

455 Overall survival (OS) from the TCGA Pan-Cancer Clinical Data Resource (Liu et al., 2018)  
456 was used to generate Kaplan-Meier curves using a modified version of the ggkm function  
457 (Abhijit, n.d.). Patients with less than one day of follow-up were excluded and survival data  
458 were censored after a follow-up duration of 10 years. Hazard ratios (HR) between ICR Low  
459 and ICR High groups, including corresponding p-values based on chi-squared test, and  
460 confidence interval were calculated using the R package survival (v2.41-3). The forest plot  
461 (**Figure 1C**) was generated using the R package forestplot (v1.7.2). Cancer types PCPG,  
462 THYM, TGCT, and KICH were excluded before generation of the plot, as the number of deaths  
463 in the comparison groups was too small for calculations. Cancer types with a HR > 1 with a p-  
464 value < 0.1 were termed ICR-enabled and cancer types with a HR < 1 with a p-value < 0.1  
465 were termed ICR-disabled. The forest plot was annotated manually with indicators for ICR-  
466 enabled and ICR-disabled cancer types. Cox proportional hazards regression analysis was  
467 performed with the R package survival with the AJCC pathologic tumor stage as described in  
468 the TCGA Pan-Cancer Clinical Data Resource (Liu et al., 2018). For simplification, stage  
469 categories were reduced to “Stage I”, “Stage II”, “Stage III” and “Stage IV” for subcategories  
470 (e.g. Stage IIA, Stage IIB, Stage IIC etc). In multivariate analysis, pathologic stage was entered  
471 as a semi-continuous (ordinal) variable. Cancer types LGG and GBM were not included in the  
472 multivariate analysis as tumor stage is unavailable (not applicable) for these histologies.

473

#### 474 *Gene Set Enrichment Analysis*

475 To define the enrichment of specific gene sets, either reflecting immune cell types (**Figure 2A**)  
476 or specific oncogenic pathways (**Figure 2B**), single sample GSEA (Barbie et al., 2009) was  
477 performed on the log2 transformed, normalized expression data. Immune cell-specific  
478 signatures as described in Bindea *et al* (Bindea et al., 2013) were used as gene sets using  
479 this method to deconvolute immune cell abundance. Gene sets to define enrichment of  
480 specific tumor-related pathways were obtained from the multiple sources. We started with a  
481 selection of 24 Hallmark pathways (Liberzon et al., 2015) which are regularly expressed in

482 cancer. Subsequently, we added 21 non-redundant Ingenuity Pathway Analysis (IPA)  
483 pathways (<http://www.ingenuity.com>, Ingenuity System Inc., Redwood City, CA, USA). Finally,  
484 several pathways were added that have previously been hypothesized to associate with  
485 cancer immune phenotypes, including Hypoxia/Adenosine Immune Cell Suppression,  
486 Immunogenic Cell Death (ICD), NOS1 Signature, PI3Kgamma signature, and SHC1/pSTAT3  
487 signatures as described by Lu *et al* (Lu et al., 2017), barrier genes as described by Salerno *et*  
488 *al* (Salerno et al., 2016), the proliferation metagene as described by Miller *et al* (Miller et al.,  
489 2016) and genes upregulated in MAPK mutated breast cancer (Bedognetti et al., 2017).

490

#### 491 *Correlation matrix*

492 The correlation matrices of ICR genes (**Supplementary Figure 1**) and correlation between  
493 ICR score and ES of selected pathways (**Figure 2B**) were calculated using Pearson test and  
494 plotted using “corrplot” version 0.84.

495

#### 496 *Mutational Analysis*

497 Mutation rate and predicted neoantigen count data (Thorsson et al., 2018) were log<sub>10</sub>-  
498 transformed and distribution across ICR clusters was plotted using R package “ggplot2”.  
499 Differences between ICR High, Medium and Low clusters were calculated through t-test, using  
500 a cut-off p-value of < 0.05. For specific mutation analysis, a set of 470 frequently mutated  
501 genes in cancer (Iorio et al., 2016), was selected. An elastic net regularized (Zou and Hastie,  
502 2005) model was built to predict the ICR score as function of mutations in each sample and  
503 using the tumor-type as a covariate. The accuracy of the model was evaluated in a ten-fold  
504 cross-validation setting computing the correlation between the model prediction and the true  
505 ICR scores, finally obtaining a Spearman correlation of  $0.669 \pm 0.012$  (p-value <  $10^{-400}$ ).

506 The R package “ComplexHeatmap” was used to plot ICR score ratios between  
507 mutated versus wild-type groups. For cancer type/ gene combinations with a number of  
508 samples of <3 in the mutated group, ratios were not calculated (NA; grey color in plot). A ratio  
509 >1 implies that the ICR score is higher in the mutated group compared with WT, while a ratio  
510 <1 implies that the ICR score is higher in subset of tumors without mutation.

511

#### 512 *Aneuploidy*

513 Aneuploidy scores for each individual cancer were taken from Taylor *et al* (Taylor et al., 2018).  
514 Briefly, each tumor was scored for the presence of aneuploid chromosome arms after  
515 accounting for tumor ploidy. Tumor aneuploidy scores for each cohort were then compared to  
516 ICR scores via linear model with and without purity adjustment. Purity adjustment entailed  
517 correlating ICR score and tumor purity (as estimated via ABSOLUTE) and using the residuals  
518 to evaluate the post-adjustment relationship between ICR score and tumor aneuploidy. In

519 particular we made use of the precomputed aneuploidy scores and ABSOLUTE tumor purity  
520 values. Raw ICR and aneuploidy score associations were evaluated by linear model in R via  
521 the *lm()* function for each cohort independently. Adjusted ICR and aneuploidy score  
522 associations were evaluated by first modeling ICR score by tumor purity, then taking the ICR  
523 score residuals and assessing the association with aneuploidy score via linear model. Cohorts  
524 with model p-values below 0.01 for adjusted or unadjusted ICR score and aneuploidy,  
525 regardless of the directionality of the association, were included in **Figure 3C**.

526

#### 527 *Differential GSEA and stratified survival analysis*

528 Differential ES analysis between samples of ICR-enabled and those of ICR-disabled cancer  
529 types was performed using t-tests, with a cut-off of FDR-adjusted p-value (i.e., q-value) < 0.05  
530 (**Supplementary Table 2**). Tumor intrinsic pathways that were differentially enriched between  
531 ICR-enabled and disabled cancer types were selected. The heatmap used for visualization of  
532 these differences was generated using the adapted heatmap.3 function ([source function](#)). For  
533 each of these selected pathways, samples were categorized pan-cancer as pathway-High (ES  
534 > median ES) or pathway-Low (ES < median ES). Associations between ICR and survival  
535 were defined for each pathway “High” and pathway “Low” group separately using the survival  
536 analysis methodology as described above. Pathways for which a significant association  
537 between ICR and survival was present in one group, but not in the other one, were selected  
538 (**Supplementary Table 3**). Similarly, these pathways were used to categorize samples per  
539 individual cancer type in pathway-High (ES > cancer specific median ES) and pathway-Low  
540 (ES < cancer specific median ES). Differences between HRs of groups in individual cancer  
541 types were calculated and plotted using “ComplexHeatmap” (v1.17.1).

542

#### 543 *Predictive value ICR score in immune checkpoint datasets*

544 ICR scores, or the mean expression of ICR genes, were compared between responders and  
545 non-responders to immune checkpoint therapy. For the Chen et al dataset, performed on  
546 Nanostring platform, scores were calculated using the 17 ICR genes available in the  
547 nanostring panel. Difference in mean ICR score between groups was tested using two-side t-  
548 test (cutoff <0.95) (**Fig 7A**). For datasets, GSE78220 (Riaz et al., 2017), GSE78220 (Hugo et  
549 al., 2016) and Prat et al (Prat et al., 2017), the response category includes both partial and  
550 complete clinical responders according to respective publications. For Chen et al, clinical  
551 responders also included stable disease, as described by Chen et al (Chen et al., 2016).  
552 Dataset van Allen et al, response was defined as patients with clinical response or long-term  
553 survival after treatment (Van Allen et al., 2015). Samples of van Allen dataset were  
554 dichotomized based on median ssGSEA of 1) genes of the proliferation metagene and 2) TGF-  
555  $\beta$  signaling signature. Stratified analysis was performed in each of the categories. ICR High,



556 Medium and Low groups were defined according to ICR score tertiles, to obtain groups of  
557 sufficient size. Stratified survival analysis was performed using the same approach as applied  
558 to the TCGA data.

559

## 560 **Discussion**

561 Transcriptional signatures used to define the continuum of cancer immune surveillance  
562 and the functional orientation of a protective anti-tumor immunity typically reflect common  
563 immune processes and include largely overlapping genes (Ayers et al., 2017; Hendrickx et  
564 al., 2017; Wang et al., 2008). We termed this signature as the ICR (Galon et al., 2013; Wang  
565 et al., 2008).

566 In our systematic analysis we showed that, across and within different tumors, the  
567 coordinated overexpression of ICR identifies a microenvironment polarized toward a Th-  
568 1/cytotoxic response, which was then used to define the hot/immune active tumors.

569 In tumor types with medium/high mutational burden, the mutational or neoantigenic  
570 load tended to be higher in hot (ICR high) vs cold (ICR low) tumors while this association was  
571 not observed within cancer types with overall low mutational burden. By adding granularity to  
572 previous observations that described an overall weak correlation between immunologic  
573 correlates of anti-tumor immune response and mutational load (Danaher et al., 2018; Ock et  
574 al., 2017; Rooney et al., 2015; Spranger et al., 2016; Thorsson et al., 2018), we demonstrated  
575 here that the differences in term of mutational load was especially evident in tumors types  
576 known to be constituted by a significant proportion of microsatellite instable cases, such as  
577 COAD, STAD and UCEC. It is likely that, in hypermutated tumors, the excess of neoantigens  
578 plays a major role in the immune recognition, while, in the other cases, additional mechanisms,  
579 such as cell-intrinsic features, play a major role in shaping the anti-tumor immune response  
580 (Hendrickx et al., 2017). Overall, a high mutational/neoantigen load was neither sufficient nor  
581 necessary for the displaying of an active immune microenvironment.

582 When the ICR score was intersected with the enrichment of oncogenic signals as  
583 predicted by the transcriptional data, interesting associations emerged. Although some  
584 differences in terms of the degree of the correlation were observed across cancers, few tumor-  
585 cell intrinsic pathways displayed a coherent progressive enrichment in the immune-silent  
586 tumors. The top pathways associated with the absence of the Th1/hot immune phenotype  
587 included, barrier genes, WNT- $\beta$  catenin, mismatch repair, telomerase extension by  
588 telomerase, Notch, Hedgehog, and AMPK signaling pathways. Barrier genes encode for  
589 molecules with mechanical barrier function in the skin and other tissues and include filaggrin  
590 (FLG), tumor-associated calcium signal transducer 2 (TACSTD2), desmosomal proteins  
591 (DST, DSC3, DSP, PPL, PKP3, and JUP) (Salerno et al., 2016). Their expression was  
592 associated with a T-cell excluded phenotype in melanoma and ovarian cancer, and here we



593 extended our previous observation across multiple tumors (Salerno et al., 2016). The cell-  
594 intrinsic WNT- $\beta$  catenin activation impairs CCL4-mediated recruitment of Batf3 dendritic cells,  
595 followed by absence of CXCL10 mediated T-cell recruitment, and was described initially  
596 associated with T-cell exclusion in melanoma, and recently, in other tumor types (Luke et al.,  
597 2019; Spranger et al., 2015). The efficiency of our approach in capturing previously described  
598 oncogenic pathways indicates the robustness of the analysis. At the same time, our integrative  
599 pipeline unveiled additional relevant pathways: telomere extension by telomerase and  
600 mismatch repair, Notch, Hedgehog and AMPK signaling. Our findings suggest that the lack of  
601 expression of transcripts involved with mismatch repair (in addition to their genetic integrity  
602 (Barnetson et al., 2006)) might influence immunogenicity. Telomere dysfunctions result in  
603 various disease, including cancer and inflammatory disease (Calado and Young, 2012). To  
604 our knowledge, this is the first time that telomerase activity has been linked to differential  
605 intratumor immune response. The Notch pathway can regulate several target genes controlled  
606 by the NF $\kappa$ B, TGF- $\beta$ , mTORC2, PI3K, and HIF1 $\alpha$  pathways (Janghorban et al., 2018) and is  
607 involved in the induction of cancer stem cells, but has not been described to be associated  
608 with differential intratumoral immune response so far. As for the Hedgehog pathway, in breast  
609 cancer models, inhibition of this signaling induces a marked reduction in immune-suppressive  
610 innate and adaptive cells paralleled with an enrichment of cytotoxic immune cells (Hanna et  
611 al., 2019). Intriguingly, the AMPK pathway was the most coherently dysregulated pathway in  
612 relationship to the ICR score. In lung cancer mouse models, the deletion of LKB1 (an upstream  
613 modulator of AMPK pathway) was associated with decrease T cell tumor infiltration, and  
614 impaired production of pro-inflammatory cytokines, which was mediated by induction of  
615 STAT3 and IL-6 secretion (Koyama et al., 2016; Spranger and Gajewski, 2018). The strength  
616 of the inverse association between the AMPK pathway and ICR score strongly calls for in-  
617 depth investigation of the immune-modulatory role of this pathway. Overall, we identified novel  
618 putative hierarchically relevant cancer-cell intrinsic pathways associated with immune evasion  
619 mechanisms in humans that might warrant further mechanistic investigations and that might  
620 be explored as targets for reprogramming the tumor microenvironment. The biological  
621 relevance here is substantiated by the consistency of the associations across tumor types, in  
622 which each cohort can be seen as an independent validation. The coherence of the  
623 associations rules out the possibility of a spurious correlation.

624 As for somatic mutations, the top ten genes associated with the immune silent  
625 phenotype include *IDH1*, *IDH2*, *FOXA2*, *NSD1*, *PSIP1*, *HDAC3*, *ZNF814*, *MAP3K1*, *FRG1*  
626 and *SOX17*. Findings of *IDH1* and *NSD1* are consistent with the report of Thorsson et al  
627 (Thorsson et al., 2018), in which these have been associated with decreased leukocyte  
628 infiltration, and are complemented here by additional identification of *IDH2*. Interestingly,  
629 *MAP3K1* mutations were previously associated with low ICR in breast cancer in our previous

630 work (Bedognetti et al., 2017; Hendrickx et al., 2017). Remarkably, mutations of other genes  
631 of the RAS/MAPK pathways such as *FGFR3* (previously associated with T-cell exclusion in  
632 bladder cancer (Sweis et al., 2016)), *EGFR*, *NRAS*, and *KRAS* were associated with a low  
633 ICR score, substantiating their potential role in mediating immune exclusion. *FOXA2* is  
634 involved in both neoplastic transformation and epithelial-mesenchymal transition (Wang et al.,  
635 2018, p. 2) and T helper differentiation (Chen et al., 2010) but its role in modulating anti-tumor  
636 immune response is unknown. Similarly, no data exists on the effect of *HDAC3*, *PSIP1* and  
637 *ZNF814* on tumor immunogenicity. Considering the strength of the association, further  
638 investigations should mechanistically address the role of these signaling pathways in  
639 mediating immune evasion mechanisms. Other mutations associated with the immune silent  
640 phenotype include *WNT5A* (corroborating the immune-suppressive role of the WNT  $\beta$  catenin  
641 pathway (Luke et al., 2019)), and *GATA3*, which was also previously associated with low  
642 leukocyte infiltration (Thorsson et al., 2018). Mutations of *FKBP5*, *MAT2A*, *PPP2R5A*,  
643 *MECOM*, *SMAD2*, *MED17*, *ADAM10*, *PRKAR1A*, *DIS3*, *PRRX1*, *MFNG*, *TNPO1*, *KDM6A*,  
644 *IRF7*, *SUZ12*, *RPSAP58*, and *SF3B1* represent additional novel findings. Similar to previous  
645 observations, we found *HLA-A*, *HLA-B*, *B2M*, *CASP8* and *FAS* to be associated with an ICR  
646 High immune phenotype (Ock et al., 2017; Rooney et al., 2015; Shukla et al., 2015; Siemers  
647 et al., 2017; Thorsson et al., 2018). These mutations are probably the result of immune escape  
648 mechanisms triggered by immunologic pressure.

649 As for genomic instability, tumors with high aneuploidy are associated with decreased  
650 ICR score in a major subset of cancer types (Davoli et al., 2017). This observation is also in  
651 agreement with negative association of a chromosome-unstable type with an immune  
652 signature that predicts response to immunotherapy with MAGE-A3 antigen as well as  
653 response to anti-CTLA-4 treatment in melanoma (Ock et al., 2017). The only exceptions we  
654 found were brain tumors LGG and GBM in which a positive association between aneuploidy  
655 and ICR score was detected. In LGG tumors, however, ICR scores positively correlate with  
656 tumor grade (**Supplementary Figure 4**), and it is possible that the observed positive  
657 correlation between aneuploidy and ICR is actually driven by the higher genomic instability  
658 characterizing the more advanced tumors.

659 To compare cancer types based on the prognostic value of ICR, we categorized them  
660 into two groups: one for which ICR High was associated with increased OS and one for which  
661 ICR was associated with worse OS. For the first group, multivariate analysis confirmed a  
662 positive prognostic value of ICR independent of pathologic tumor stage. SKCM, BRCA, UCEC,  
663 LIHC, SARC, HNSC, STAD, and BLCA are consequently referred to as **ICR-enabled** cancer  
664 types. For the second group, including UVM, LGG, PAAD, and KIRC (**ICR-disabled** tumors),  
665 survival analysis showed a detrimental (univariate analysis) or neutral (multivariate analysis  
666 with stage) role of ICR.

667           These discrepancies in term of prognostic implication of intratumoral immune  
668 response have been observed in independent investigations based on transcriptomic analysis  
669 (Chifman et al., 2016; Thorsson et al., 2018) or immunohistochemistry (Fridman et al., 2012)  
670 but never explained.

671           The first notable difference we observed between ICR-enabled and -disabled cancer  
672 types was the overall lower ICR value in the disabled cancer cohorts. In particular for UVM  
673 and LGG, this low ICR could be a partial explanation for the lack of positive prognostic value  
674 of the ICR. On the other hand, mean ICR score of PAAD and KIRC was not different compared  
675 with the other cancer types. Therefore, other factors must have an effect on the prognostic  
676 value of the ICR. When we compared enrichment of tumor-cell intrinsic pathways in ICR-  
677 enabled and -disabled cancer types, as much as 43 of 54 analyzed pathways showed  
678 differential enrichment between the two groups. While ICR-enabled cancer types are typically  
679 more enriched in proliferation-related signatures, ICR-disabled cancer types have high  
680 enrichment of pathways generally attributed to tumor signaling including known pathways  
681 associated with immune suppression such as TGF- $\beta$  (Chakravarthy et al., 2018). In fact, when  
682 samples of the entire cohort were segregated according to representative enabling and  
683 disabling pathways (i.e., proliferation and TGF- $\beta$  signaling, respectively), the prognostic role  
684 of ICR was restricted to proliferation high/TGF- $\beta$  signaling low tumors (**Figure 6**). Hierarchical  
685 clustering based on the enrichment of transcripts of these differentially enriched pathways  
686 segregated most samples of ICR-enabled cancer types from samples of ICR-disabled cancer  
687 types. Interestingly, this clustering was even relevant to samples of ICR neutral cancer types.  
688 The pan-cancer survival analysis of samples of ICR neutral cancer types showed that for  
689 samples that co-clustered with samples of ICR-enabled cancer types (the ICR beneficial  
690 cluster), ICR High was associated with significant prolonged survival. Conversely, in samples  
691 of ICR neutral cancer types clustered to the ICR non-beneficial cluster, ICR lost its prognostic  
692 value. Adding the mutational load component further refined this stratification. In fact, the  
693 positive prognostic role of ICR was present also in a subset of samples with low proliferation  
694 and high mutational load but absent only in tumors with both low proliferation and low  
695 mutational load. We hypothesize that, in tumor with high mutational burden and/or high  
696 proliferative capacity, the high level of ICR captures a true protective anti-tumoral immune  
697 response, while in the other cases, such as in tumors dominated by TGF- $\beta$  signaling and low  
698 proliferation, the high ICR captures a bystander, or heavily suppressed, lymphocyte infiltration  
699 with no protective effect. Therefore, it is possible to speculate that a proportion of  
700 phenotypically immune active tumors are functionally immune silent. Single cell RNA  
701 sequencing, T-cell receptor sequencing, and spatial transcriptional analysis might be  
702 employed to characterize with higher fidelity the true functional orientation of human tumors.

703           The clinical relevance of the observed conditional impact of ICR was confirmed in the  
704 setting of anti-CTLA4 treatment, in which the predictive value of ICR was demonstrated to be  
705 dependent on tumor intrinsic pathways, such as TGF- $\beta$  and proliferation. To the best of our  
706 knowledge, we are the first to report an interaction between tumor intrinsic pathways and the  
707 prognostic value of immune phenotypes in a pan-cancer analysis. An association between  
708 proliferation and the prognostic value of immune phenotypes has previously been identified in  
709 breast cancer (Miller et al., 2016). In non-small cell lung cancer, proliferation was shown to  
710 improve prediction of immune checkpoint inhibitors response in PD-L1 positive samples (data  
711 recently presented at SITC annual meeting 2018 (“SITC 2018 Annual Meeting Schedule,”  
712 n.d.)). Our study clearly demonstrates that such interactions between tumor intrinsic attributes  
713 and prognostic and potentially predictive value of immune phenotypes are also relevant in a  
714 pan-cancer context. Moreover, we defined additional tumor intrinsic attributes beyond tumor  
715 proliferation to correlate with the prognostic significance of immune signatures reflecting a Th1  
716 immune response. Prognostication algorithms should be refined by inclusion of tumor intrinsic  
717 attributes in order to define the prognostic impact of the immune signatures.

718           In conclusion, we observed a clear relationship between enrichment of tumor intrinsic  
719 pathways and the prognostic and predictive significance of the immune signatures and  
720 identified novel cell-intrinsic features associated with immune exclusion. This information can  
721 be used to prioritize candidates for immunogenic conversion and to refine stratification  
722 algorithms.

## 723 References

- 724 Abhijit. n.d. An enhanced Kaplan-Meier plot. *Stat Bandit*.
- 725 Ayers M, Lunceford J, Nebozhyn M, Murphy E, Loboda A, Kaufman DR, Albright A, Cheng  
726 JD, Kang SP, Shankaran V, Piha-Paul SA, Yearley J, Seiwert TY, Ribas A,  
727 McClanahan TK. 2017. IFN- $\gamma$ -related mRNA profile predicts clinical response to PD-1  
728 blockade. *J Clin Invest* 127:2930–2940. doi:10.1172/JCI91190
- 729 Barbie DA, Tamayo P, Boehm JS, Kim SY, Moody SE, Dunn IF, Schinzel AC, Sandy P,  
730 Meylan E, Scholl C, Fröhling S, Chan EM, Sos ML, Michel K, Mermel C, Silver SJ,  
731 Weir BA, Reiling JH, Sheng Q, Gupta PB, Wadlow RC, Le H, Hoersch S, Wittner BS,  
732 Ramaswamy S, Livingston DM, Sabatini DM, Meyerson M, Thomas RK, Lander ES,  
733 Mesirov JP, Root DE, Gilliland DG, Jacks T, Hahn WC. 2009. Systematic RNA  
734 interference reveals that oncogenic KRAS-driven cancers require TBK1. *Nature*  
735 462:108–112. doi:10.1038/nature08460
- 736 Barnetson RA, Tenesa A, Farrington SM, Nicholl ID, Cetnarskyj R, Porteous ME, Campbell  
737 H, Dunlop MG. 2006. Identification and Survival of Carriers of Mutations in DNA  
738 Mismatch-Repair Genes in Colon Cancer. *N Engl J Med* 354:2751–2763.  
739 doi:10.1056/NEJMoa053493
- 740 Bedognetti D, Hendrickx W, Ceccarelli M, Miller LD, Seliger B. 2016. Disentangling the  
741 relationship between tumor genetic programs and immune responsiveness. *Curr*  
742 *Opin Immunol*, Lymphocyte development and activation \* Tumour immunology  
743 39:150–158. doi:10.1016/j.coi.2016.02.001
- 744 Bedognetti D, Roelands J, Decock J, Wang E, Hendrickx W. 2017. The MAPK hypothesis:  
745 immune-regulatory effects of MAPK-pathway genetic dysregulations and implications  
746 for breast cancer immunotherapy. *Emerg Top Life Sci* 1:429–445.  
747 doi:10.1042/ETLS20170142
- 748 Bedognetti D, Spivey TL, Zhao Y, Uccellini L, Tomei S, Dudley ME, Ascierto ML, De Giorgi  
749 V, Liu Q, Delogu LG, Sommariva M, Sertoli MR, Simon R, Wang E, Rosenberg SA,  
750 Marincola FM. 2013. CXCR3/CCR5 pathways in metastatic melanoma patients  
751 treated with adoptive therapy and interleukin-2. *Br J Cancer* 109:2412–2423.  
752 doi:10.1038/bjc.2013.557
- 753 Bertucci F, Finetti P, Simeone I, Hendrickx W, Wang E, Marincola FM, Viens P, Mamessier  
754 E, Ceccarelli M, Birnbaum D, Bedognetti D. 2018. The immunologic constant of  
755 rejection classification refines the prognostic value of conventional prognostic  
756 signatures in breast cancer. *Br J Cancer*. doi:10.1038/s41416-018-0309-1
- 757 Bindea G, Mlecnik B, Tosolini M, Kirilovsky A, Waldner M, Obenauf AC, Angell H, Fredriksen  
758 T, Lafontaine L, Berger A, Bruneval P, Fridman WH, Becker C, Pagès F, Speicher  
759 MR, Trajanoski Z, Galon J. 2013. Spatiotemporal dynamics of intratumoral immune  
760 cells reveal the immune landscape in human cancer. *Immunity* 39:782–795.  
761 doi:10.1016/j.immuni.2013.10.003
- 762 Calado R, Young N. 2012. Telomeres in disease. *F1000 Med Rep* 4:8. doi:10.3410/M4-8
- 763 Caliński T, Harabasz J. 1974. A dendrite method for cluster analysis. *Commun Stat* 3:1–27.  
764 doi:10.1080/03610927408827101
- 765 Chakravarthy A, Khan L, Bensler NP, Bose P, Carvalho DDD. 2018. TGF- $\beta$ -associated  
766 extracellular matrix genes link cancer-associated fibroblasts to immune evasion and  
767 immunotherapy failure. *Nat Commun* 9:4692. doi:10.1038/s41467-018-06654-8
- 768 Charoentong P, Finotello F, Angelova M, Mayer C, Efremova M, Rieder D, Hackl H,  
769 Trajanoski Z. 2017. Pan-cancer Immunogenomic Analyses Reveal Genotype-  
770 Immunophenotype Relationships and Predictors of Response to Checkpoint  
771 Blockade. *Cell Rep* 18:248–262. doi:10.1016/j.celrep.2016.12.019
- 772 Chen G, Wan H, Luo F, Zhang L, Xu Y, Lewkowich I, Wills-Karp M, Whitsett JA. 2010.  
773 Foxa2 programs Th2 cell-mediated innate immunity in the developing lung. *J*  
774 *Immunol Baltim Md* 1950 184:6133–6141. doi:10.4049/jimmunol.1000223
- 775 Chen P-L, Roh W, Reuben A, Cooper ZA, Spencer CN, Prieto PA, Miller JP, Bassett RL,  
776 Gopalakrishnan V, Wani K, De Macedo MP, Austin-Breneman JL, Jiang H, Chang Q,



- 777 Reddy SM, Chen W-S, Tetzlaff MT, Broaddus RJ, Davies MA, Gershenwald JE,  
778 Haydu L, Lazar AJ, Patel SP, Hwu P, Hwu W-J, Diab A, Glitza IC, Woodman SE,  
779 Vence LM, Wistuba II, Amaria RN, Kwong LN, Prieto V, Davis RE, Ma W, Overwijk  
780 WW, Sharpe AH, Hu J, Futreal PA, Blando J, Sharma P, Allison JP, Chin L, Wargo  
781 JA. 2016. Analysis of Immune Signatures in Longitudinal Tumor Samples Yields  
782 Insight into Biomarkers of Response and Mechanisms of Resistance to Immune  
783 Checkpoint Blockade. *Cancer Discov* 6:827–837. doi:10.1158/2159-8290.CD-15-  
784 1545
- 785 Chifman J, Pullikuth A, Chou JW, Bedognetti D, Miller LD. 2016. Conservation of immune  
786 gene signatures in solid tumors and prognostic implications. *BMC Cancer* 16:911.  
787 doi:10.1186/s12885-016-2948-z
- 788 Corrales L, Matson V, Flood B, Spranger S, Gajewski TF. 2017. Innate immune signaling  
789 and regulation in cancer immunotherapy. *Cell Res* 27:96–108.  
790 doi:10.1038/cr.2016.149
- 791 Cortes-Ciriano I, Lee S, Park W-Y, Kim T-M, Park PJ. 2017. A molecular portrait of  
792 microsatellite instability across multiple cancers. *Nat Commun* 8.  
793 doi:10.1038/ncomms15180
- 794 Danaher P, Warren S, Lu R, Samayoa J, Sullivan A, Pekker I, Wallden B, Marincola FM,  
795 Cesano A. 2018. Pan-cancer adaptive immune resistance as defined by the Tumor  
796 Inflammation Signature (TIS): results from The Cancer Genome Atlas (TCGA). *J*  
797 *Immunother Cancer* 6:63. doi:10.1186/s40425-018-0367-1
- 798 Dandapani M, Hardie DG. 2013. AMPK: opposing the metabolic changes in both tumour  
799 cells and inflammatory cells? *Biochem Soc Trans* 41:687–693.  
800 doi:10.1042/BST20120351
- 801 Davoli T, Uno H, Wooten EC, Elledge SJ. 2017. Tumor aneuploidy correlates with markers  
802 of immune evasion and with reduced response to immunotherapy. *Science*  
803 355:eaaf8399. doi:10.1126/science.aaf8399
- 804 Dobin A, Davis CA, Schlesinger F, Drenkow J, Zaleski C, Jha S, Batut P, Chaisson M,  
805 Gingeras TR. 2013. STAR: ultrafast universal RNA-seq aligner. *Bioinforma Oxf Engl*  
806 29:15–21. doi:10.1093/bioinformatics/bts635
- 807 Economopoulou P, Perisanidis C, Giotakis EI, Psyrris A. 2016. The emerging role of  
808 immunotherapy in head and neck squamous cell carcinoma (HNSCC): anti-tumor  
809 immunity and clinical applications. *Ann Transl Med* 4. doi:10.21037/atm.2016.03.34
- 810 Ellrott K, Bailey MH, Saksena G, Covington KR, Kandoth C, Stewart C, Hess J, Ma S, Chiotti  
811 KE, McLellan M, Sofia HJ, Hutter C, Getz G, Wheeler D, Ding L, MC3 Working  
812 Group, Cancer Genome Atlas Research Network. 2018. Scalable Open Science  
813 Approach for Mutation Calling of Tumor Exomes Using Multiple Genomic Pipelines.  
814 *Cell Syst* 6:271-281.e7. doi:10.1016/j.cels.2018.03.002
- 815 Emens LA, Ascierto PA, Darcy PK, Demaria S, Eggermont AMM, Redmond WL, Seliger B,  
816 Marincola FM. 2017. Cancer immunotherapy: Opportunities and challenges in the  
817 rapidly evolving clinical landscape. *Eur J Cancer Oxf Engl* 1990 81:116–129.  
818 doi:10.1016/j.ejca.2017.01.035
- 819 Fridman WH, Pagès F, Sautès-Fridman C, Galon J. 2012. The immune contexture in human  
820 tumours: impact on clinical outcome. *Nat Rev Cancer* 12:298–306.  
821 doi:10.1038/nrc3245
- 822 Galon J, Angell HK, Bedognetti D, Marincola FM. 2013. The Continuum of Cancer  
823 Immunosurveillance: Prognostic, Predictive, and Mechanistic Signatures. *Immunity*  
824 39:11–26. doi:10.1016/j.immuni.2013.07.008
- 825 Gong J, Chehrizi-Raffle A, Reddi S, Salgia R. 2018. Development of PD-1 and PD-L1  
826 inhibitors as a form of cancer immunotherapy: a comprehensive review of registration  
827 trials and future considerations. *J Immunother Cancer* 6:8. doi:10.1186/s40425-018-  
828 0316-z
- 829 Hanna A, Metge BJ, Bailey SK, Chen D, Chandrashekar DS, Varambally S, Samant RS,  
830 Shevde LA. 2019. Inhibition of Hedgehog signaling reprograms the dysfunctional

- 831 immune microenvironment in breast cancer. *Oncoimmunology* 8:1548241.  
832 doi:10.1080/2162402X.2018.1548241
- 833 Hendrickx W, Simeone I, Anjum S, Mokrab Y, Bertucci F, Finetti P, Curigliano G, Seliger B,  
834 Cerulo L, Tomei S, Delogu LG, Maccalli C, Wang E, Miller LD, Marincola FM,  
835 Ceccarelli M, Bedognetti D. 2017. Identification of genetic determinants of breast  
836 cancer immune phenotypes by integrative genome-scale analysis. *Oncolmmunology*  
837 0:00–00. doi:10.1080/2162402X.2016.1253654
- 838 Hugo W, Zaretsky JM, Sun L, Song C, Moreno BH, Hu-Lieskovan S, Berent-Maoz B, Pang  
839 J, Chmielowski B, Cherry G, Seja E, Lomeli S, Kong X, Kelley MC, Sosman JA,  
840 Johnson DB, Ribas A, Lo RS. 2016. Genomic and Transcriptomic Features of  
841 Response to Anti-PD-1 Therapy in Metastatic Melanoma. *Cell* 165:35–44.  
842 doi:10.1016/j.cell.2016.02.065
- 843 Iorio F, Knijnenburg TA, Vis DJ, Bignell GR, Menden MP, Schubert M, Aben N, Gonçalves  
844 E, Barthorpe S, Lightfoot H, Cokelaer T, Greninger P, Dyk E van, Chang H, Silva H  
845 de, Heyn H, Deng X, Egan RK, Liu Q, Mironenko T, Mitropoulos X, Richardson L,  
846 Wang J, Zhang T, Moran S, Sayols S, Soleimani M, Tamborero D, Lopez-Bigas N,  
847 Ross-Macdonald P, Esteller M, Gray NS, Haber DA, Stratton MR, Benes CH,  
848 Wessels LFA, Saez-Rodriguez J, McDermott U, Garnett MJ. 2016. A Landscape of  
849 Pharmacogenomic Interactions in Cancer. *Cell* 166:740–754.  
850 doi:10.1016/j.cell.2016.06.017
- 851 Janghorban M, Xin L, Rosen JM, Zhang XH-F. 2018. Notch Signaling as a Regulator of the  
852 Tumor Immune Response: To Target or Not To Target? *Front Immunol* 9.  
853 doi:10.3389/fimmu.2018.01649
- 854 Koyama S, Akbay EA, Li YY, Aref AR, Skoulidis F, Herter-Sprie GS, Buczkowski KA, Liu Y,  
855 Awad MM, Denning WL, Diao L, Wang J, Parra-Cuentas ER, Wistuba II, Soucheray  
856 M, Thai T, Asahina H, Kitajima S, Altabef A, Cavanaugh JD, Rhee K, Gao P, Zhang  
857 H, Fecci PE, Shimamura T, Hellmann MD, Heymach JV, Hodi FS, Freeman GJ,  
858 Barbie DA, Dranoff G, Hammerman PS, Wong K-K. 2016. STK11/LKB1 Deficiency  
859 Promotes Neutrophil Recruitment and Proinflammatory Cytokine Production to  
860 Suppress T-cell Activity in the Lung Tumor Microenvironment. *Cancer Res* 76:999–  
861 1008. doi:10.1158/0008-5472.CAN-15-1439
- 862 Liberzon A, Birger C, Thorvaldsdóttir H, Ghandi M, Mesirov JP, Tamayo P. 2015. The  
863 Molecular Signatures Database Hallmark Gene Set Collection. *Cell Syst* 1:417–425.  
864 doi:10.1016/j.cels.2015.12.004
- 865 Liu J, Lichtenberg T, Hoadley KA, Poisson LM, Lazar AJ, Cherniack AD, Kovatich AJ, Benz  
866 CC, Levine DA, Lee AV, Omberg L, Wolf DM, Shriver CD, Thorsson V, Cancer  
867 Genome Atlas Research Network, Hu H. 2018. An Integrated TCGA Pan-Cancer  
868 Clinical Data Resource to Drive High-Quality Survival Outcome Analytics. *Cell*  
869 173:400-416.e11. doi:10.1016/j.cell.2018.02.052
- 870 Lu R, Turan T, Samayoa J, Marincola FM. 2017. Cancer immune resistance: can theories  
871 converge? *Emerg Top Life Sci* 1:411–419. doi:10.1042/ETLS20170060
- 872 Luke JJ, Bao R, Sweis RF, Spranger S, Gajewski TF. 2019. WNT/ $\beta$ -catenin pathway  
873 activation correlates with immune exclusion across human cancers. *Clin Cancer Res*  
874 *Off J Am Assoc Cancer Res*. doi:10.1158/1078-0432.CCR-18-1942
- 875 McGranahan T, Li G, Nagpal S. 2017. History and current state of immunotherapy in glioma  
876 and brain metastasis. *Ther Adv Med Oncol* 9:347–368.  
877 doi:10.1177/1758834017693750
- 878 Miller LD, Chou JA, Black MA, Print C, Chifman J, Alistar A, Putti T, Zhou X, Bedognetti D,  
879 Hendrickx W, Pullikuth A, Rennhack J, Andrechek ER, Demaria S, Wang E,  
880 Marincola FM. 2016. Immunogenic Subtypes of Breast Cancer Delineated by Gene  
881 Classifiers of Immune Responsiveness. *Cancer Immunol Res*. doi:10.1158/2326-  
882 6066.CIR-15-0149
- 883 Nagalla S, Chou JW, Willingham MC, Ruiz J, Vaughn JP, Dubey P, Lash TL, Hamilton-  
884 Dutoit SJ, Bergh J, Sotiriou C, Black MA, Miller LD. 2013. Interactions between



- 885 immunity, proliferation and molecular subtype in breast cancer prognosis. *Genome*  
886 *Biol* 14:R34. doi:10.1186/gb-2013-14-4-r34
- 887 Ock C-Y, Hwang J-E, Keam B, Kim S-B, Shim J-J, Jang H-J, Park S, Sohn BH, Cha M, Ajani  
888 JA, Kopetz S, Lee K-W, Kim TM, Heo DS, Lee J-S. 2017. Genomic landscape  
889 associated with potential response to anti-CTLA-4 treatment in cancers. *Nat*  
890 *Commun* 8:1050. doi:10.1038/s41467-017-01018-0
- 891 Passarelli A, Mannavola F, Stucci LS, Tucci M, Silvestris F. 2017. Immune system and  
892 melanoma biology: a balance between immunosurveillance and immune escape.  
893 *Oncotarget* 8:106132–106142. doi:10.18632/oncotarget.22190
- 894 Prat A, Navarro A, Paré L, Reguart N, Galvan P, Pascual T, Martínez A, Nuciforo P,  
895 Comerma L, Alos L, Pardo N, Cedrés S, Fan C, Parker JS, Gaba L, Victoria I,  
896 Viñolas N, Vivancos A, Arance A, Felip E. 2017. Immune-related gene expression  
897 profiling after PD-1 blockade in non-small cell lung carcinoma, head and neck  
898 squamous cell carcinoma and melanoma. *Cancer Res* canres.3556.2017.  
899 doi:10.1158/0008-5472.CAN-16-3556
- 900 Riaz N, Havel JJ, Makarov V, Desrichard A, Urba WJ, Sims JS, Hodi FS, Martín-Algarra S,  
901 Mandal R, Sharfman WH, Bhatia S, Hwu W-J, Gajewski TF, Slingluff CL, Chowell D,  
902 Kendall SM, Chang H, Shah R, Kuo F, Morris LGT, Sidhom J-W, Schneck JP, Horak  
903 CE, Weinhold N, Chan TA. 2017. Tumor and Microenvironment Evolution during  
904 Immunotherapy with Nivolumab. *Cell*. doi:10.1016/j.cell.2017.09.028
- 905 Risso D, Schwartz K, Sherlock G, Dudoit S. 2011. GC-Content Normalization for RNA-Seq  
906 Data. *BMC Bioinformatics* 12:480. doi:10.1186/1471-2105-12-480
- 907 Rooney MS, Shukla SA, Wu CJ, Getz G, Hacohen N. 2015. Molecular and Genetic  
908 Properties of Tumors Associated with Local Immune Cytolytic Activity. *Cell* 160:48–  
909 61. doi:10.1016/j.cell.2014.12.033
- 910 Salerno EP, Bedognetti D, Mauldin IS, Deacon DH, Shea SM, Pinczewski J, Obeid JM,  
911 Coukos G, Wang E, Gajewski TF, Marincola FM, Slingluff CL. 2016. Human  
912 melanomas and ovarian cancers overexpressing mechanical barrier molecule genes  
913 lack immune signatures and have increased patient mortality risk. *Oncology*  
914 5:e1240857. doi:10.1080/2162402X.2016.1240857
- 915 Shukla SA, Rooney MS, Rajasagi M, Tiao G, Dixon PM, Lawrence MS, Stevens J, Lane WJ,  
916 Dellagatta JL, Steelman S, Sougnez C, Cibulskis K, Kiezun A, Hacohen N, Brusic V,  
917 Wu CJ, Getz G. 2015. Comprehensive analysis of cancer-associated somatic  
918 mutations in class I HLA genes. *Nat Biotechnol* 33:1152–1158. doi:10.1038/nbt.3344
- 919 Siemers NO, Holloway JL, Chang H, Chasalow SD, Ross-MacDonald PB, Voliva CF,  
920 Szustakowski JD. 2017. Genome-wide association analysis identifies genetic  
921 correlates of immune infiltrates in solid tumors. *PLoS ONE* 12.  
922 doi:10.1371/journal.pone.0179726
- 923 SITC 2018 Annual Meeting Schedule. n.d. <https://www.sitcancer.org/2018/schedule>
- 924 Spranger S, Bao R, Gajewski TF. 2015. Melanoma-intrinsic  $\beta$ -catenin signalling prevents  
925 anti-tumour immunity. *Nature* 523:231–235. doi:10.1038/nature14404
- 926 Spranger S, Gajewski TF. 2018. Impact of oncogenic pathways on evasion of antitumour  
927 immune responses. *Nat Rev Cancer* 18:139–147. doi:10.1038/nrc.2017.117
- 928 Spranger S, Gajewski TF. 2015. Tumor-intrinsic oncogene pathways mediating immune  
929 avoidance. *Oncology* 5. doi:10.1080/2162402X.2015.1086862
- 930 Spranger S, Luke JJ, Bao R, Zha Y, Hernandez KM, Li Y, Gajewski AP, Andrade J,  
931 Gajewski TF. 2016. Density of immunogenic antigens does not explain the presence  
932 or absence of the T-cell-inflamed tumor microenvironment in melanoma. *Proc Natl*  
933 *Acad Sci U S A* 113:E7759–E7768. doi:10.1073/pnas.1609376113
- 934 Sweis RF, Spranger S, Bao R, Paner GP, Stadler WM, Steinberg G, Gajewski TF. 2016.  
935 Molecular Drivers of the Non-T-cell-Inflamed Tumor Microenvironment in Urothelial  
936 Bladder Cancer. *Cancer Immunol Res* 4:563–568. doi:10.1158/2326-6066.CIR-15-  
937 0274
- 938 Tamborero D, Rubio-Perez C, Muiños F, Sabarinathan R, Piulats JM, Muntasell A,  
939 Dienstmann R, Lopez-Bigas N, Gonzalez-Perez A. 2018. A pan-cancer landscape of

940 interactions between solid tumors and infiltrating immune cell populations. *Clin*  
941 *Cancer Res* clincanres.3509.2017. doi:10.1158/1078-0432.CCR-17-3509  
942 Taylor AM, Shih J, Ha G, Gao GF, Zhang X, Berger AC, Schumacher SE, Wang C, Hu H,  
943 Liu Jianfang, Lazar AJ, Caesar-Johnson SJ, Demchok JA, Felau I, Kasapi M,  
944 Ferguson ML, Hutter CM, Sofia HJ, Tarnuzzer R, Wang Z, Yang L, Zenklusen JC,  
945 Zhang J (Julia), Chudamani S, Liu Jia, Lolla L, Naresh R, Pihl T, Sun Q, Wan Y, Wu  
946 Y, Cho J, DeFreitas T, Frazer S, Gehlenborg N, Getz G, Heiman DI, Kim J,  
947 Lawrence MS, Lin P, Meier S, Noble MS, Saksena G, Voet D, Zhang Hailei, Bernard  
948 B, Chambwe N, Dhankani V, Knijnenburg T, Kramer R, Leinonen K, Liu Y, Miller M,  
949 Reynolds S, Shmulevich I, Thorsson V, Zhang W, Akbani R, Broom BM, Hegde AM,  
950 Ju Z, Kanchi RS, Korkut A, Li J, Liang H, Ling S, Liu W, Lu Y, Mills GB, Ng K-S, Rao  
951 A, Ryan M, Wang Jing, Weinstein JN, Zhang J, Abeshouse A, Armenia J,  
952 Chakravarty D, Chatila WK, Bruijn I de, Gao J, Gross BE, Heins ZJ, Kundra R, La K,  
953 Ladanyi M, Luna A, Nissan MG, Ochoa A, Phillips SM, Reznik E, Sanchez-Vega F,  
954 Sander C, Schultz N, Sheridan R, Sumer SO, Sun Y, Taylor BS, Wang Jioajiao,  
955 Zhang Hongxin, Anur P, Peto M, Spellman P, Benz C, Stuart JM, Wong CK, Yau C,  
956 Hayes DN, Parker JS, Wilkerson MD, Ally A, Balasundaram M, Bowlby R, Brooks D,  
957 Carlsen R, Chuah E, Dhalla N, Holt R, Jones SJM, Kasaian K, Lee D, Ma Y, Marra  
958 MA, Mayo M, Moore RA, Mungall AJ, Mungall K, Robertson AG, Sadeghi S, Schein  
959 JE, Sipahimalani P, Tam A, Thiessen N, Tse K, Wong T, Berger AC, Beroukheim R,  
960 Cherniack AD, Cibulskis C, Gabriel SB, Gao GF, Ha G, Meyerson M, Schumacher  
961 SE, Shih J, Kucherlapati MH, Kucherlapati RS, Baylin S, Cope L, Danilova L,  
962 Bootwalla MS, Lai PH, Maglinte DT, Berg DJVD, Weisenberger DJ, Auman JT, Balu  
963 S, Bodenheimer T, Fan C, Hoadley KA, Hoyle AP, Jefferys SR, Jones CD, Meng S,  
964 Mieczkowski PA, Mose LE, Perou AH, Perou CM, Roach J, Shi Y, Simons JV, Skelly  
965 T, Soloway MG, Tan D, Veluvolu U, Fan H, Hinoue T, Laird PW, Shen H, Zhou W,  
966 Bellair M, Chang K, Covington K, Creighton CJ, Dinh H, Doddapaneni H, Donehower  
967 LA, Drummond J, Gibbs RA, Glenn R, Hale W, Han Y, Hu J, Korchina V, Lee S,  
968 Lewis L, Li W, Liu X, Morgan M, Morton D, Muzny D, Santibanez J, Sheth M,  
969 Shinbrot E, Wang L, Wang M, Wheeler DA, Xi L, Zhao F, Hess J, Appelbaum EL,  
970 Bailey M, Cordes MG, Ding L, Fronick CC, Fulton LA, Fulton RS, Kandoth C, Mardis  
971 ER, McLellan MD, Miller CA, Schmidt HK, Wilson RK, Crain D, Curley E, Gardner J,  
972 Lau K, Mallery D, Morris S, Paulauskis J, Penny R, Shelton C, Shelton T, Sherman  
973 M, Thompson E, Yena P, Bowen J, Gastier-Foster JM, Gerken M, Leraas KM,  
974 Lichtenberg TM, Ramirez NC, Wise L, Zmuda E, Corcoran N, Costello T, Hovens C,  
975 Carvalho AL, Carvalho AC de, Fregnani JH, Longatto-Filho A, Reis RM,  
976 Scapulatempo-Neto C, Silveira HCS, Vidal DO, Burnette A, Eschbacher J, Hermes  
977 B, Noss A, Singh R, Anderson ML, Castro PD, Ittmann M, Huntsman D, Kohl B, Le  
978 X, Thorp R, Andry C, Duffy ER, Lyadov V, Paklina O, Setdikova G, Shabunin A,  
979 Tavobilov M, McPherson C, Warnick R, Berkowitz R, Cramer D, Feltmate C,  
980 Horowitz N, Kibel A, Muto M, Raut CP, Malykh A, Barnholtz-Sloan JS, Barrett W,  
981 Devine K, Fulop J, Ostrom QT, Shimmel K, Wolinsky Y, Sloan AE, Rose AD,  
982 Giuliante F, Goodman M, Karlan BY, Hagedorn CH, Eckman J, Harr J, Myers J,  
983 Tucker K, Zach LA, Deyarmin B, Hu H, Kvecher L, Larson C, Mural RJ, Somiari S,  
984 Vicha A, Zelinka T, Bennett J, Iacocca M, Rabeno B, Swanson P, Latour M,  
985 Lacombe L, Têtu B, Bergeron A, McGraw M, Staugaitis SM, Chabot J, Hibshoosh H,  
986 Sepulveda A, Su T, Wang T, Potapova O, Voronina O, Desjardins L, Mariani O,  
987 Roman-Roman S, Sastre X, Stern M-H, Cheng F, Signoretti S, Berchuck A, Bigner  
988 D, Lipp E, Marks J, McCall S, McLendon R, Secord A, Sharp A, Behera M, Brat DJ,  
989 Chen A, Delman K, Force S, Khuri F, Magliocca K, Maithel S, Olson JJ, Owonikoko  
990 T, Pickens A, Ramalingam S, Shin DM, Sica G, Meir EGV, Zhang Hongzheng,  
991 Eijckenboom W, Gillis A, Korpershoek E, Looijenga L, Oosterhuis W, Stoop H,  
992 Kessel KE van, Zwarthoff EC, Calatozzolo C, Cuppini L, Cuzzubbo S, DiMeco F,  
993 Finocchiaro G, Mattei L, Perin A, Pollo B, Chen C, Houck J, Lohavanichbutr P,  
994 Hartmann A, Stoehr C, Stoehr R, Taubert H, Wach S, Wullich B, Kycler W, Murawa

995 D, Wiznerowicz M, Chung K, Edenfield WJ, Martin J, Baudin E, Bublely G, Bueno R,  
996 Rienzo AD, Richards WG, Kalkanis S, Mikkelsen T, Noushmehr H, Scarpace L,  
997 Girard N, Aymerich M, Campo E, Giné E, Guillermo AL, Bang NV, Hanh PT, Phu BD,  
998 Tang Y, Colman H, Evason K, Dottino PR, Martignetti JA, Gabra H, Juhl H,  
999 Akeredolu T, Stepa S, Hoon D, Ahn K, Kang KJ, Beuschlein F, Breggia A, Birrer M,  
1000 Bell D, Borad M, Bryce AH, Castle E, Chandan V, Chevillie J, Copland JA, Farnell M,  
1001 Flotte T, Giama N, Ho T, Kendrick M, Kocher J-P, Kopp K, Moser C, Nagorney D,  
1002 O'Brien D, O'Neill BP, Patel T, Petersen G, Que F, Rivera M, Roberts L, Smallridge  
1003 R, Smyrk T, Stanton M, Thompson RH, Torbenson M, Yang JD, Zhang L, Brimo F,  
1004 Ajani JA, Gonzalez AMA, Behrens C, Bondaruk J, Broaddus R, Czerniak B, Esmaeli  
1005 B, Fujimoto J, Gershenwald J, Guo C, Lazar AJ, Logothetis C, Meric-Bernstam F,  
1006 Moran C, Ramondetta L, Rice D, Sood A, Tamboli P, Thompson T, Troncoso P,  
1007 Tsao A, Wistuba I, Carter C, Haydu L, Hersey P, Jakrot V, Kakavand H, Kefford R,  
1008 Lee K, Long G, Mann G, Quinn M, Saw R, Scolyer R, Shannon K, Spillane A, Stretch  
1009 J, Synott M, Thompson J, Wilmott J, Al-Ahmadie H, Chan TA, Ghossein R, Gopalan  
1010 A, Levine DA, Reuter V, Singer S, Singh B, Tien NV, Broudy T, Mirsaidi C, Nair P,  
1011 Drwiega P, Miller J, Smith J, Zaren H, Park J-W, Hung NP, Kebebew E, Linehan  
1012 WM, Metwalli AR, Pacak K, Pinto PA, Schiffman M, Schmidt LS, Vocke CD,  
1013 Wentzensen N, Worrell R, Yang H, Moncrieff M, Goparaju C, Melamed J, Pass H,  
1014 Botnariuc N, Caraman I, Cernat M, Chemencedji I, Clipca A, Doruc S, Gorincioi G,  
1015 Mura S, Pirtac M, Stancul I, Tcaciuc D, Albert M, Alexopoulou I, Arnaout A, Bartlett J,  
1016 Engel J, Gilbert S, Parfitt J, Sekhon H, Thomas G, Rassl DM, Rintoul RC, Bifulco C,  
1017 Tamakawa R, Urba W, Hayward N, Timmers H, Antenucci A, Facciolo F, Grazi G,  
1018 Marino M, Merola R, Krijger R de, Gimenez-Roqueplo A-P, Piché A, Chevalier S,  
1019 McKercher G, Birsoy K, Barnett G, Brewer C, Farver C, Naska T, Pennell NA,  
1020 Raymond D, Schilero C, Smolenski K, Williams F, Morrison C, Borgia JA, Liptay MJ,  
1021 Pool M, Seder CW, Junker K, Omberg L, Dinkin M, Manikhas G, Alvaro D, Bragazzi  
1022 MC, Cardinale V, Carpino G, Gaudio E, Chesla D, Cottingham S, Dubina M,  
1023 Moiseenko F, Dhanasekaran R, Becker K-F, Janssen K-P, Slotta-Huspenina J,  
1024 Abdel-Rahman MH, Aziz D, Bell S, Cebulla CM, Davis A, Duell R, Elder JB, Hilty J,  
1025 Kumar B, Lang J, Lehman NL, Mandt R, Nguyen P, Pilarski R, Rai K, Schoenfield L,  
1026 Senecal K, Wakely P, Hansen P, Lechan R, Powers J, Tischler A, Grizzle WE,  
1027 Sexton KC, Kastl A, Henderson J, Porten S, Waldmann J, Fassnacht M, Asa SL,  
1028 Schadendorf D, Couce M, Graefen M, Huland H, Sauter G, Schlomm T, Simon R,  
1029 Tennstedt P, Olabode O, Nelson M, Bathe O, Carroll PR, Chan JM, Disaia P, Glenn  
1030 P, Kelley RK, Landen CN, Phillips J, Prados M, Simko J, Smith-McCune K,  
1031 VandenBerg S, Roggin K, Fehrenbach A, Kendler A, Sifri S, Steele R, Jimeno A,  
1032 Carey F, Forgie I, Mannelli M, Carney M, Hernandez B, Campos B, Herold-Mende C,  
1033 Jungk C, Unterberg A, Deimling A von, Bossler A, Galbraith J, Jacobus L, Knudson  
1034 M, Knutson T, Ma D, Milhem M, Sigmund R, Godwin AK, Madan R, Rosenthal HG,  
1035 Adebamowo C, Adebamowo SN, Boussioutas A, Beer D, Giordano T, Mes-Masson  
1036 A-M, Saad F, Bocklage T, Landrum L, Mannel R, Moore K, Moxley K, Postier R,  
1037 Walker J, Zuna R, Feldman M, Valdivieso F, Dhir R, Luketich J, Pinero EMM,  
1038 Quintero-Aguilo M, Carlotti CG, Santos JSD, Kemp R, Sankarankuty A, Tirapelli D,  
1039 Catto J, Agnew K, Swisher E, Creaney J, Robinson B, Shelley CS, Godwin EM,  
1040 Kendall S, Shipman C, Bradford C, Carey T, Haddad A, Moyer J, Peterson L, Prince  
1041 M, Rozek L, Wolf G, Bowman R, Fong KM, Yang I, Korst R, Rathmell WK,  
1042 Fantacone-Campbell JL, Hooke JA, Kovatich AJ, Shriver CD, DiPersio J, Drake B,  
1043 Govindan R, Heath S, Ley T, Tine BV, Westervelt P, Rubin MA, Lee JI, Aredes ND,  
1044 Mariamidze A, Cherniack AD, Beroukhim R, Meyerson M. 2018. Genomic and  
1045 Functional Approaches to Understanding Cancer Aneuploidy. *Cancer Cell* 33:676-  
1046 689.e3. doi:10.1016/j.ccell.2018.03.007  
1047 Thomas A, Routh ED, Pullikuth A, Jin G, Su J, Chou JW, Hoadley KA, Print C, Knowlton N,  
1048 Black MA, Demaria S, Wang E, Bedognetti D, Jones WD, Mehta GA, Gatz ML,  
1049 Perou CM, Page DB, Triozzi P, Miller LD. 2018. Tumor mutational burden is a

- 1050 determinant of immune-mediated survival in breast cancer. *Oncoimmunology* 7.  
1051 doi:10.1080/2162402X.2018.1490854
- 1052 Thorsson V, Gibbs DL, Brown SD, Wolf D, Bortone DS, Ou Yang T-H, Porta-Pardo E, Gao  
1053 GF, Plaisier CL, Eddy JA, Ziv E, Culhane AC, Paull EO, Sivakumar IKA, Gentles AJ,  
1054 Malhotra R, Farshidfar F, Colaprico A, Parker JS, Mose LE, Vo NS, Liu J, Liu Y,  
1055 Rader J, Dhankani V, Reynolds SM, Bowlby R, Califano A, Cherniack AD,  
1056 Anastassiou D, Bedognetti D, Rao A, Chen K, Krasnitz A, Hu H, Malta TM,  
1057 Noushmehr H, Pedamallu CS, Bullman S, Ojesina AI, Lamb A, Zhou W, Shen H,  
1058 Choueiri TK, Weinstein JN, Guinney J, Saltz J, Holt RA, Rabkin CE, Cancer Genome  
1059 Atlas Research Network, Lazar AJ, Serody JS, Demicco EG, Disis ML, Vincent BG,  
1060 Shmulevich L. 2018. The Immune Landscape of Cancer. *Immunity* 48:812-830.e14.  
1061 doi:10.1016/j.immuni.2018.03.023
- 1062 Turan T, Kannan D, Patel M, Matthew Barnes J, Tanlimco SG, Lu R, Halliwill K, Kongpachith  
1063 S, Kline DE, Hendrickx W, Cesano A, Butterfield LH, Kaufman HL, Hudson TJ,  
1064 Bedognetti D, Marincola F, Samayoa J. 2018. Immune oncology, immune  
1065 responsiveness and the theory of everything. *J Immunother Cancer* 6:50.  
1066 doi:10.1186/s40425-018-0355-5
- 1067 Van Allen EM, Miao D, Schilling B, Shukla SA, Blank C, Zimmer L, Sucker A, Hillen U,  
1068 Foppen MHG, Goldinger SM, Utikal J, Hassel JC, Weide B, Kaehler KC, Loquai C,  
1069 Mohr P, Gutzmer R, Dummer R, Gabriel S, Wu CJ, Schadendorf D, Garraway LA.  
1070 2015. Genomic correlates of response to CTLA-4 blockade in metastatic melanoma.  
1071 *Science* 350:207–211. doi:10.1126/science.aad0095
- 1072 Varn FS, Wang Y, Mullins DW, Fiering S, Cheng C. 2017. Systematic pan-cancer analysis  
1073 reveals immune cell interactions in the tumor microenvironment. *Cancer Res*  
1074 77:1271–1282. doi:10.1158/0008-5472.CAN-16-2490
- 1075 Wang B, Liu G, Ding L, Zhao J, Lu Y. 2018. FOXA2 promotes the proliferation, migration  
1076 and invasion, and epithelial mesenchymal transition in colon cancer. *Exp Ther Med*  
1077 16:133–140. doi:10.3892/etm.2018.6157
- 1078 Wang E, Bedognetti D, Marincola FM. 2013a. Prediction of Response to Anticancer  
1079 Immunotherapy Using Gene Signatures. *J Clin Oncol* 31:2369–2371.  
1080 doi:10.1200/JCO.2013.49.2157
- 1081 Wang E, Bedognetti D, Tomei S, Marincola FM. 2013b. Common pathways to tumor  
1082 rejection. *Ann N Y Acad Sci* 1284:75–79. doi:10.1111/nyas.12063
- 1083 Wang E, Worschech A, Marincola FM. 2008. The immunologic constant of rejection. *Trends*  
1084 *Immunol* 29:256–262. doi:10.1016/j.it.2008.03.002
- 1085 Zou H, Hastie T. 2005. Regularization and Variable Selection via the Elastic Net. *J R Stat*  
1086 *Soc Ser B Stat Methodol* 67:301–320.  
1087  
1088



1089 **Author contributions**

1090 J.R. contributed to the conception and design of the work, data acquisition and data  
1091 interpretation, performed data analysis, and drafted the manuscript;

1092 W.H. contributed to the conception and design of the work, data acquisition and data  
1093 interpretation, performed data analysis, and drafted the manuscript;

1094 P.K. contributed to the design of the work, interpretation of data, and substantively revised the  
1095 manuscript;

1096 R.M. contributed to analysis and interpretation of data;

1097 G.Z. contributed to the analysis and substantively revised the manuscript;

1098 M.S. contributed to interpretation of data and revision of manuscript;

1099 K.H. contributed to the analysis and revision of manuscript;

1100 G.C. contributed to interpretation of data;

1101 D.R. contributed to the acquisition and analysis, interpretation of data, and revision of  
1102 manuscript;

1103 J.D. contributed to data interpretation and writing of the manuscript;

1104 L.D. contributed to data interpretation and writing of the manuscript;

1105 T.T. contributed to the analysis and revision of manuscript;

1106 J.S. contributed to the analysis and revision of manuscript;

1107 L.C. contributed to data interpretation and writing of the manuscript;

1108 E.W. contributed to data interpretation, and substantively revised the manuscript;

1109 P.F. substantively contributed to the manuscript;

1110 F.B. contributed to data interpretation and writing of the manuscript;

1111 L.M. contributed to the conception and design of the work, interpretation of data, and  
1112 substantively revised the manuscript;

1113 J.G. contributed to data interpretation and revision of manuscript;

1114 F.M. contributed to data interpretation, and substantively revised the manuscript;

1115 M.C. contributed to the conception and design of the work, data acquisition, data analysis  
1116 and data interpretation, and substantively revised the manuscript;

1117 D.B. conceived and designed the study, contributed to the acquisition, data analysis and data  
1118 interpretation, supervised the analysis and drafted the manuscript.

1119

1120 **Competing interests**

1121 The authors do not have any competing interests to disclose.

1122

1123 **AbbVie disclosures:**

1124 Tolga Turan, Josue Samayoa, and Michele Ceccarelli are all employees of AbbVie.

1125

1126 **Materials and Correspondence**

1127

1128 Michele Ceccarelli: [mceccarelli@abbvie.com](mailto:mceccarelli@abbvie.com)

1129 Wouter Hendrickx: [whendrickx@sidra.org](mailto:whendrickx@sidra.org)

1130 Davide Bedognetti: [dbedognetti@sidra.org](mailto:dbedognetti@sidra.org)

1131

1132 **Ethics approval and consent to participate**

1133 Not applicable.

1134

1135 **Availability of data and material**

1136 Scripts for analysis are shared on <https://github.com/Sidra-TBI-FCO/ISPC.git>. Data generated  
1137 or analyzed during this study are included in this article. Data sheets for results of individual  
1138 cancer types are available as cancer data sheets at figshare  
1139 ([https://figshare.com/articles/Cancer\\_Datasheets/7937246](https://figshare.com/articles/Cancer_Datasheets/7937246)).

1140

1141

1142 **Funding**

1143 This research has been supported by Qatar Foundation, Qatar National Research Fund  
1144 (grant numbers: JSREP07-010-3-005 and NPRP-10-0126-170262 awarded to WH and DB,  
1145 respectively).



1146 **Figure Legends**

1147

1148 **Figure 1: Immunologic classification of 31 cancer types based on expression of ICR**  
1149 **gene signature A.** Consensus cluster matrix of SKCM samples based on RNA-seq  
1150 expression values of ICR genes (left panel). RNA-seq expression heatmap of ICR genes  
1151 annotated with ICR consensus clusters (n = 469). Clusters with intermediate ICR gene  
1152 expression levels (ICR Medium1 and ICR Medium2) were combined to obtain ICR High,  
1153 Medium and Low groups (HML classification). ICR genes reflect 4 components of immune  
1154 mediated tissue rejection: Th1 signaling, CXCR3/CCR5 chemokines, immune effectors and  
1155 immune regulatory functions (right panel). **B.** Boxplot of ICR scores across ICR clusters in  
1156 31 cancer types. Cancer types are ordered by mean ICR score per cancer. **C.** Forest plot  
1157 showing HRs (overall survival) of ICR Low versus High, p-value and number of patients (N)  
1158 for each of the cancer types. ICR-enabled cancer types ( $HR > 1$ ;  $p < 0.1$ ) are indicated with  
1159 orange asterisks and ICR-disabled cancer types ( $HR < 1$ ;  $p > 0.1$ ) are indicated with purple  
1160 asterisks. Cancer types PCPG, THYM and TGCT are excluded from the plot, because  
1161 confidence intervals ranged from 0 to infinite due to low number of deaths in these cancer  
1162 types. **D.** Kaplan Meier curves showing OS across two three different ICR groups in ICR-  
1163 enabled and ICR-disabled cancer types.  
1164 (Figures of panel A and Kaplan Meier curves for each individual cancer type are available in  
1165 the [cancer datasheets](#)).

1166

1167 **Figure 2: Deconvolution of immune cell populations and enrichment of oncogenic**  
1168 **pathways through single sample GSEA. A.** Heatmap of enrichment values for cell-specific  
1169 immune-signatures as described by Bindea *et al.* Samples are ordered by ICR cluster and  
1170 ordered by cancer type within ICR clusters. **B.** Pearson coefficient of correlation between  
1171 ICR score and enrichment scores of oncogenic pathways per cancer. Pathways that have a  
1172 positive correlation with ICR are green and those with an inverse correlation are blue.

1173

1174 **Figure 3: Association of ICR with nonsilent mutation rate, predicted neoantigen load,**  
1175 **and tumor aneuploidy. A.** Scatter plot of log transformed nonsilent mutation count per ICR  
1176 cluster for each cancer type. **B.** Log transformed predicated neoantigen load per ICR cluster  
1177 for each cancer type. **A.B.** Red crossbar represents the mean value per ICR cluster. Cancer  
1178 types are ordered by mean nonsilent mutation count per cancer. Nonsilent mutation rate and  
1179 predicted neoantigen load were obtained from Thorsson et al (Thorsson et al., 2018). **C.**  
1180 Correlation between aneuploidy score and raw/purity adjusted ICR score for all cohorts with  
1181 significant relationships between ICR and aneuploidy.

1182

1183

1184 **Figure 4: Relationship between ICR score and mutations in individual genes. A.** Top  
1185 35 of mutated genes with negative non-zero coefficients of a trained elastic net model  
1186 identified genes whose mutation is associated with a decrease of the ICR (left panel). Top  
1187 35 mutated genes with a positive association with ICR score in pan-cancer trained model  
1188 (right panel). Contributions of each individual cancer type to the coefficient in trained elastic  
1189 net model are proportionally indicated by size of the bars. **B.** Ratio of mean ICR score in  
1190 mutated samples and ICR score in WT samples. Cancer types are ordered manually based  
1191 on patterns of calculated ratios.

1192

1193 **Figure 5: Pan-cancer clustering based on oncogenic pathway enrichment segregates**  
1194 **ICR-enabled and ICR-disabled cancer types. A.** Heatmap of enrichment scores of  
1195 selected oncogenic pathways, samples are hierarchically clustered in two main clusters: one  
1196 cluster consists mostly of ICR-enabled cancer types (ICR beneficial cluster), while the  
1197 second cluster contains all samples from ICR-disabled cancer types (ICR non-beneficial  
1198 cluster). **B.** Kaplan-Meier OS curves for ICR High, Medium, and Low clusters for samples in  
1199 the ICR beneficial and ICR non-beneficial cluster separately. **C.** Subgroup survival analysis  
1200 of all samples of ICR-neutral cancer types clustered in the ICR beneficial cluster and ICR  
1201 non-beneficial cluster.

1202

1203 **Figure 6: Examples of pan-cancer binary classifications based on enrichment of**  
1204 **individual tumor intrinsic gene signatures and corresponding stratified pan-cancer**  
1205 **survival analysis. A.** Histogram showing pan-cancer classification based on median pan-  
1206 cancer enrichment value of the proliferation signature as described by Miller *et al.*(Miller et  
1207 al., 2016) (Proliferation Low: ES is lower than median ES observed pan-cancer; Proliferation  
1208 High: ES is higher or equal to median ES observed pan-cancer). **B.** Pan-cancer Kaplan  
1209 Meier curves of ICR groups stratified by Proliferation High (left panel) and Proliferation Low  
1210 (right panel) groups corresponding to classification as shown in panel A. **C.** Histogram  
1211 showing pan-cancer classification based on pan-cancer enrichment values of the Hallmark  
1212 pathway TGF- $\beta$  signaling. **D.** Pan-cancer Kaplan Meier curves stratified by TGF- $\beta$  signaling  
1213 Low (left panel) and TGF- $\beta$  signaling High (right panel) groups corresponding to  
1214 classification as shown in panel C.

1215

1216

1217 **Figure 7: Conditional predictive value of ICR for response to immune checkpoint**  
1218 **treatment. A.** Predictive value of ICR across public datasets with response to immune  
1219 checkpoint treatment indicated by p-value of two-sided t-test comparing ICR score in samples

1220 of responding versus non-responding patients. ICR score was highest in response group for  
1221 all significant comparisons. Response was defined as long-survival or response in the van  
1222 Allen dataset, stable disease, partial response (PR) and complete response (CR) in the Chen  
1223 dataset, and as PRCR in Riaz, Hugo and Prat datasets. **B.** Boxplot of ICR score in  
1224 “nonresponse” compared with “long-survival or response” to anti-CTLA4 treatment in van Allen  
1225 dataset (left). Boxplots of subgroup analysis of proliferation groups (middle) and TGF- $\beta$   
1226 signaling groups (right). P-value of t-test comparing means are indicated in the plot. **C.** Kaplan  
1227 Meier curves showing OS across ICR tertiles in all samples (left), across proliferation (middle),  
1228 and TGF- $\beta$  signaling subgroups (left).

1229

1230

### 1231 **Supplementary Figures**

1232 **Supplementary Figure 1:** Pearson correlation between RNA-seq expression values of ICR  
1233 genes for each of the 31 cancer types.

1234

1235 **Supplementary Figure 2:** Scatterplot showing correlation between ICR score and TIS  
1236 score (Danaher et al., 2018) (**A**), ICR score and leukocyte fraction (**B**), and ICR score and  
1237 TIL percentage (**C**). Leukocyte fraction and TIL percentage values were obtained from  
1238 Thorsson *et al* (Thorsson et al., 2018). Each dot represents a single sample.

1239

1240 **Supplementary Figure 3: A.** Boxplot showing mean ICR score for each cancer type per  
1241 group of cancer types: ICR-enabled, ICR-neutral and ICR-disabled. A single dot represents  
1242 a single cancer type. **B.** Boxplot showing delta between mean ICR score in ICR High cluster  
1243 compared with mean ICR score in ICR Low cluster. A single dot represents a single cancer  
1244 type.

1245

1246 **Supplementary Figure 4:** Pan-cancer Kaplan-Meier curves in ICR-disabled (top left panel)  
1247 and ICR-enabled (top right panel) groups and stratified analysis by AJCC pathologic stage I  
1248 & II (middle panels) and stage III & IV (bottom panels).

1249

1250 **Supplementary Figure 5:** Dotted heatmap showing mean ES for each immune cell  
1251 population per cancer type, mean ES scores were z-scored per row.

1252

1253 **Supplementary Figure 6: A.** Scatterplot of mean mutation rate versus mean neoantigen  
1254 load per cancer type. **B.** Ratio of nonsilent mutation rate between ICR High and ICR Low  
1255 groups versus the ratio of predicted neoantigen load between in ICR High compared to ICR  
1256 Low groups. **C.** Ratio of nonsilent mutation rate between ICR High and ICR Low groups

1257 versus mean nonsilent mutation rate. **D.** Ratio of predicted neoantigen load between ICR  
1258 High compared to ICR Low groups versus mean predicted neoantigen load.

1259

1260 **Supplementary Figure 7: A.** Boxplot of ICR score by MSI status in COAD (left panel) and  
1261 STAD (right panel). P-values of t-test to compare mean ICR score per MSI group are  
1262 indicated in the plot. **B.** Boxplot of number of mutated genes with a negative coefficient in  
1263 ICR trained elastic net model by MSI status in COAD (left panel) and STAD (right panel). P-  
1264 values of t-test to compare mean number of mutations per MSI group are indicated in the  
1265 plot.

1266

1267 **Supplementary Figure 8:** Table to check overlap between tumor intrinsic pathways genes  
1268 and frequently mutated genes. When a gene (columns) is part of a gene signature (rows),  
1269 this is indicated by “YES”, if not, it is indicated by “NO”. Genes that have a negative  
1270 coefficient in trained model are shown in blue, pathways that inversely correlate with ICR  
1271 (**Figure 2B**) are indicated in blue. Genes that have a positive coefficient in trained model are  
1272 shown in red, pathways that positively correlate with ICR (**Figure 2B**) are indicated in red.

1273

1274 **Supplementary Figure 9:** Scatterplots of each of the combinations of: 1) ICR scores, 2)  
1275 proliferation ES, 3) TGF- $\beta$  signaling ES, and 4) mutation rate (n = 4452). Pearson’s  
1276 correlation coefficient and regression line (red) are indicated in the plots.

1277

1278 **Supplementary Figure 10:** Pan-cancer Kaplan Meier curves of ICR groups stratified by  
1279 both Proliferation High (left panels) and Proliferation Low (right panels) groups  
1280 (corresponding to classification of shown in **Figure 6A**) and by Mutation rate High (top  
1281 panels) and Mutation rate Low (bottom panels) based on pan-cancer median mutation rate.

1282

1283 **Supplementary Figure 11:** Multivariate Cox proportional hazards model including ICR  
1284 classification, proliferation enrichment, TGF- $\beta$  signaling enrichment, and tumor mutation  
1285 rate.

1286

1287 **Supplementary Figure 12:** Survival analysis of ICR Low versus ICR High in pathway  
1288 enrichment categories across 40 pathway signatures (rows) for each cancer type (columns).  
1289 HRs (hazard ratios) for death in high enrichment categories (**A**) are compared with HRs in  
1290 low enrichment categories (**B**). **C.** Differences in prognostic impact of ICR classification  
1291 between pathway signature enrichment categories for each cancer type. HR of ICR Low vs.  
1292 ICR High was calculated per category from binary classification of enrichment of oncogenic  
1293 pathway signatures (rows) within individual cancer types (columns). The delta between HR

1294 in the highly enriched group and the HR in the group with low enrichment was calculated for  
1295 each signature/cancer type combination.

1296

### 1297 **Supplementary Tables**

1298

1299 **Supplementary Table 1:** Association of ICR with OS across 31 cancer types with ICR as a  
1300 categorical variable ICR Low versus ICR High (first and second column; yellow), and ICR as  
1301 continuous variable (third and fourth column; blue). HR, hazard ratio for death.

1302

1303 **Supplementary Table 2:** Comparison of mean ES of samples from ICR-disabled cancer  
1304 types with mean ES of samples from ICR-enabled cancer types for 54 oncogenic pathway  
1305 gene signatures.

1306

1307 **Supplementary Table 3:** Pan-cancer survival analysis stratified by binary classification  
1308 based on enrichment of selected oncogenic pathway signatures. HR, hazard ratio for death.
